# Supplementary material
Source: publisher figshare collection journal article supplement (https://springernature.figshare.com/ndownloader/files/18005888)
Supplement: Supplementary file 1 [file 18005888]

SiteID	TreeID	Country	Species	Site	Tree	Year	Ring width
FIBP19	FIBP1901	Finland	Betula pendula	19	1	1968	279
FIBP19	FIBP1901	Finland	Betula pendula	19	1	1969	313
FIBP19	FIBP1901	Finland	Betula pendula	19	1	1970	277
FIBP19	FIBP1901	Finland	Betula pendula	19	1	1971	333
FIBP19	FIBP1901	Finland	Betula pendula	19	1	1972	268
FIBP19	FIBP1901	Finland	Betula pendula	19	1	1973	268
FIBP19	FIBP1901	Finland	Betula pendula	19	1	1974	334
FIBP19	FIBP1901	Finland	Betula pendula	19	1	1975	292
FIBP19	FIBP1901	Finland	Betula pendula	19	1	1976	336
FIBP19	FIBP1901	Finland	Betula pendula	19	1	1977	274
FIBP19	FIBP1901	Finland	Betula pendula	19	1	1978	275
FIBP19	FIBP1901	Finland	Betula pendula	19	1	1979	226
FIBP19	FIBP1901	Finland	Betula pendula	19	1	1980	224
FIBP19	FIBP1901	Finland	Betula pendula	19	1	1981	238
FIBP19	FIBP1901	Finland	Betula pendula	19	1	1982	167
FIBP19	FIBP1901	Finland	Betula pendula	19	1	1983	214
FIBP19	FIBP1901	Finland	Betula pendula	19	1	1984	250
FIBP19	FIBP1901	Finland	Betula pendula	19	1	1985	285
FIBP19	FIBP1901	Finland	Betula pendula	19	1	1986	198
FIBP19	FIBP1901	Finland	Betula pendula	19	1	1987	179
FIBP19	FIBP1901	Finland	Betula pendula	19	1	1988	56
FIBP19	FIBP1901	Finland	Betula pendula	19	1	1989	65
FIBP19	FIBP1901	Finland	Betula pendula	19	1	1990	79
FIBP19	FIBP1901	Finland	Betula pendula	19	1	1991	120
FIBP19	FIBP1901	Finland	Betula pendula	19	1	1992	163
FIBP19	FIBP1901	Finland	Betula pendula	19	1	1993	181
FIBP19	FIBP1901	Finland	Betula pendula	19	1	1994	152
FIBP19	FIBP1901	Finland	Betula pendula	19	1	1995	120
FIBP19	FIBP1901	Finland	Betula pendula	19	1	1996	168
FIBP19	FIBP1901	Finland	Betula pendula	19	1	1997	207
FIBP19	FIBP1901	Finland	Betula pendula	19	1	1998	148
FIBP19	FIBP1901	Finland	Betula pendula	19	1	1999	122
FIBP19	FIBP1901	Finland	Betula pendula	19	1	2000	123
FIBP19	FIBP1901	Finland	Betula pendula	19	1	2001	136
FIBP19	FIBP1901	Finland	Betula pendula	19	1	2002	162
FIBP19	FIBP1901	Finland	Betula pendula	19	1	2003	138
FIBP19	FIBP1901	Finland	Betula pendula	19	1	2004	108
FIBP19	FIBP1901	Finland	Betula pendula	19	1	2005	133
FIBP19	FIBP1901	Finland	Betula pendula	19	1	2006	109
FIBP19	FIBP1901	Finland	Betula pendula	19	1	2007	128
FIBP19	FIBP1901	Finland	Betula pendula	19	1	2008	112
FIBP19	FIBP1901	Finland	Betula pendula	19	1	2009	109
FIBP19	FIBP1901	Finland	Betula pendula	19	1	2010	129
FIBP19	FIBP1901	Finland	Betula pendula	19	1	2011	81
FIBP19	FIBP1901	Finland	Betula pendula	19	1	2012	99
FIBP19	FIBP1901	Finland	Betula pendula	19	1	2013	111
FIBP19	FIBP1901	Finland	Betula pendula	19	1	2014	100
FIBP19	FIBP1901	Finland	Betula pendula	19	1	2015	89
FIBP19	FIBP1902	Finland	Betula pendula	19	2	1960	128
FIBP19	FIBP1902	Finland	Betula pendula	19	2	1961	79
FIBP19	FIBP1902	Finland	Betula pendula	19	2	1962	190
FIBP19	FIBP1902	Finland	Betula pendula	19	2	1963	371
FIBP19	FIBP1902	Finland	Betula pendula	19	2	1964	287
FIBP19	FIBP1902	Finland	Betula pendula	19	2	1965	319
FIBP19	FIBP1902	Finland	Betula pendula	19	2	1966	221
FIBP19	FIBP1902	Finland	Betula pendula	19	2	1967	255
FIBP19	FIBP1902	Finland	Betula pendula	19	2	1968	249
FIBP19	FIBP1902	Finland	Betula pendula	19	2	1969	223
FIBP19	FIBP1902	Finland	Betula pendula	19	2	1970	314
FIBP19	FIBP1902	Finland	Betula pendula	19	2	1971	360
FIBP19	FIBP1902	Finland	Betula pendula	19	2	1972	178
FIBP19	FIBP1902	Finland	Betula pendula	19	2	1973	156
FIBP19	FIBP1902	Finland	Betula pendula	19	2	1974	174
FIBP19	FIBP1902	Finland	Betula pendula	19	2	1975	170
FIBP19	FIBP1902	Finland	Betula pendula	19	2	1976	267
FIBP19	FIBP1902	Finland	Betula pendula	19	2	1977	187
FIBP19	FIBP1902	Finland	Betula pendula	19	2	1978	163
FIBP19	FIBP1902	Finland	Betula pendula	19	2	1979	150
FIBP19	FIBP1902	Finland	Betula pendula	19	2	1980	142
FIBP19	FIBP1902	Finland	Betula pendula	19	2	1981	208
FIBP19	FIBP1902	Finland	Betula pendula	19	2	1982	199
FIBP19	FIBP1902	Finland	Betula pendula	19	2	1983	174
FIBP19	FIBP1902	Finland	Betula pendula	19	2	1984	231
FIBP19	FIBP1902	Finland	Betula pendula	19	2	1985	179
FIBP19	FIBP1902	Finland	Betula pendula	19	2	1986	197
FIBP19	FIBP1902	Finland	Betula pendula	19	2	1987	165
FIBP19	FIBP1902	Finland	Betula pendula	19	2	1988	134
FIBP19	FIBP1902	Finland	Betula pendula	19	2	1989	114
FIBP19	FIBP1902	Finland	Betula pendula	19	2	1990	143
FIBP19	FIBP1902	Finland	Betula pendula	19	2	1991	157
FIBP19	FIBP1902	Finland	Betula pendula	19	2	1992	145
FIBP19	FIBP1902	Finland	Betula pendula	19	2	1993	125
FIBP19	FIBP1902	Finland	Betula pendula	19	2	1994	154
FIBP19	FIBP1902	Finland	Betula pendula	19	2	1995	147
FIBP19	FIBP1902	Finland	Betula pendula	19	2	1996	128
FIBP19	FIBP1902	Finland	Betula pendula	19	2	1997	110
FIBP19	FIBP1902	Finland	Betula pendula	19	2	1998	69
FIBP19	FIBP1902	Finland	Betula pendula	19	2	1999	106
FIBP19	FIBP1902	Finland	Betula pendula	19	2	2000	133
FIBP19	FIBP1902	Finland	Betula pendula	19	2	2001	106
FIBP19	FIBP1902	Finland	Betula pendula	19	2	2002	82
FIBP19	FIBP1902	Finland	Betula pendula	19	2	2003	60
FIBP19	FIBP1902	Finland	Betula pendula	19	2	2004	56
FIBP19	FIBP1902	Finland	Betula pendula	19	2	2005	55
FIBP19	FIBP1902	Finland	Betula pendula	19	2	2006	41
FIBP19	FIBP1902	Finland	Betula pendula	19	2	2007	41
FIBP19	FIBP1902	Finland	Betula pendula	19	2	2008	25
FIBP19	FIBP1902	Finland	Betula pendula	19	2	2009	30
FIBP19	FIBP1902	Finland	Betula pendula	19	2	2010	31
FIBP19	FIBP1902	Finland	Betula pendula	19	2	2011	66
FIBP19	FIBP1902	Finland	Betula pendula	19	2	2012	43
FIBP19	FIBP1902	Finland	Betula pendula	19	2	2013	61
FIBP19	FIBP1902	Finland	Betula pendula	19	2	2014	29
FIBP19	FIBP1902	Finland	Betula pendula	19	2	2015	31
FIBP19	FIBP1903	Finland	Betula pendula	19	3	1971	110
FIBP19	FIBP1903	Finland	Betula pendula	19	3	1972	224
FIBP19	FIBP1903	Finland	Betula pendula	19	3	1973	197
FIBP19	FIBP1903	Finland	Betula pendula	19	3	1974	191
FIBP19	FIBP1903	Finland	Betula pendula	19	3	1975	161
FIBP19	FIBP1903	Finland	Betula pendula	19	3	1976	229
FIBP19	FIBP1903	Finland	Betula pendula	19	3	1977	192
FIBP19	FIBP1903	Finland	Betula pendula	19	3	1978	217
FIBP19	FIBP1903	Finland	Betula pendula	19	3	1979	284
FIBP19	FIBP1903	Finland	Betula pendula	19	3	1980	211
FIBP19	FIBP1903	Finland	Betula pendula	19	3	1981	243
FIBP19	FIBP1903	Finland	Betula pendula	19	3	1982	159
FIBP19	FIBP1903	Finland	Betula pendula	19	3	1983	166
FIBP19	FIBP1903	Finland	Betula pendula	19	3	1984	246
FIBP19	FIBP1903	Finland	Betula pendula	19	3	1985	203
FIBP19	FIBP1903	Finland	Betula pendula	19	3	1986	162
FIBP19	FIBP1903	Finland	Betula pendula	19	3	1987	146
FIBP19	FIBP1903	Finland	Betula pendula	19	3	1988	124
FIBP19	FIBP1903	Finland	Betula pendula	19	3	1989	114
FIBP19	FIBP1903	Finland	Betula pendula	19	3	1990	139
FIBP19	FIBP1903	Finland	Betula pendula	19	3	1991	130
FIBP19	FIBP1903	Finland	Betula pendula	19	3	1992	135
FIBP19	FIBP1903	Finland	Betula pendula	19	3	1993	142
FIBP19	FIBP1903	Finland	Betula pendula	19	3	1994	128
FIBP19	FIBP1903	Finland	Betula pendula	19	3	1995	112
FIBP19	FIBP1903	Finland	Betula pendula	19	3	1996	133
FIBP19	FIBP1903	Finland	Betula pendula	19	3	1997	113
FIBP19	FIBP1903	Finland	Betula pendula	19	3	1998	102
FIBP19	FIBP1903	Finland	Betula pendula	19	3	1999	112
FIBP19	FIBP1903	Finland	Betula pendula	19	3	2000	129
FIBP19	FIBP1903	Finland	Betula pendula	19	3	2001	148
FIBP19	FIBP1903	Finland	Betula pendula	19	3	2002	168
FIBP19	FIBP1903	Finland	Betula pendula	19	3	2003	139
FIBP19	FIBP1903	Finland	Betula pendula	19	3	2004	148
FIBP19	FIBP1903	Finland	Betula pendula	19	3	2005	136
FIBP19	FIBP1903	Finland	Betula pendula	19	3	2006	190
FIBP19	FIBP1903	Finland	Betula pendula	19	3	2007	187
FIBP19	FIBP1903	Finland	Betula pendula	19	3	2008	155
FIBP19	FIBP1903	Finland	Betula pendula	19	3	2009	161
FIBP19	FIBP1903	Finland	Betula pendula	19	3	2010	144
FIBP19	FIBP1903	Finland	Betula pendula	19	3	2011	186
FIBP19	FIBP1903	Finland	Betula pendula	19	3	2012	155
FIBP19	FIBP1903	Finland	Betula pendula	19	3	2013	152
FIBP19	FIBP1903	Finland	Betula pendula	19	3	2014	111
FIBP19	FIBP1903	Finland	Betula pendula	19	3	2015	62
FIBP19	FIBP1904	Finland	Betula pendula	19	4	1963	125
FIBP19	FIBP1904	Finland	Betula pendula	19	4	1964	99
FIBP19	FIBP1904	Finland	Betula pendula	19	4	1965	106
FIBP19	FIBP1904	Finland	Betula pendula	19	4	1966	188
FIBP19	FIBP1904	Finland	Betula pendula	19	4	1967	156
FIBP19	FIBP1904	Finland	Betula pendula	19	4	1968	171
FIBP19	FIBP1904	Finland	Betula pendula	19	4	1969	131
FIBP19	FIBP1904	Finland	Betula pendula	19	4	1970	207
FIBP19	FIBP1904	Finland	Betula pendula	19	4	1971	169
FIBP19	FIBP1904	Finland	Betula pendula	19	4	1972	177
FIBP19	FIBP1904	Finland	Betula pendula	19	4	1973	238
FIBP19	FIBP1904	Finland	Betula pendula	19	4	1974	286
FIBP19	FIBP1904	Finland	Betula pendula	19	4	1975	337
FIBP19	FIBP1904	Finland	Betula pendula	19	4	1976	309
FIBP19	FIBP1904	Finland	Betula pendula	19	4	1977	240
FIBP19	FIBP1904	Finland	Betula pendula	19	4	1978	185
FIBP19	FIBP1904	Finland	Betula pendula	19	4	1979	203
FIBP19	FIBP1904	Finland	Betula pendula	19	4	1980	188
FIBP19	FIBP1904	Finland	Betula pendula	19	4	1981	249
FIBP19	FIBP1904	Finland	Betula pendula	19	4	1982	197
FIBP19	FIBP1904	Finland	Betula pendula	19	4	1983	231
FIBP19	FIBP1904	Finland	Betula pendula	19	4	1984	152
FIBP19	FIBP1904	Finland	Betula pendula	19	4	1985	131
FIBP19	FIBP1904	Finland	Betula pendula	19	4	1986	124
FIBP19	FIBP1904	Finland	Betula pendula	19	4	1987	113
FIBP19	FIBP1904	Finland	Betula pendula	19	4	1988	105
FIBP19	FIBP1904	Finland	Betula pendula	19	4	1989	140
FIBP19	FIBP1904	Finland	Betula pendula	19	4	1990	163
FIBP19	FIBP1904	Finland	Betula pendula	19	4	1991	102
FIBP19	FIBP1904	Finland	Betula pendula	19	4	1992	111
FIBP19	FIBP1904	Finland	Betula pendula	19	4	1993	92
FIBP19	FIBP1904	Finland	Betula pendula	19	4	1994	114
FIBP19	FIBP1904	Finland	Betula pendula	19	4	1995	69
FIBP19	FIBP1904	Finland	Betula pendula	19	4	1996	87
FIBP19	FIBP1904	Finland	Betula pendula	19	4	1997	88
FIBP19	FIBP1904	Finland	Betula pendula	19	4	1998	37
FIBP19	FIBP1904	Finland	Betula pendula	19	4	1999	42
FIBP19	FIBP1904	Finland	Betula pendula	19	4	2000	76
FIBP19	FIBP1904	Finland	Betula pendula	19	4	2001	53
FIBP19	FIBP1904	Finland	Betula pendula	19	4	2002	80
FIBP19	FIBP1904	Finland	Betula pendula	19	4	2003	69
FIBP19	FIBP1904	Finland	Betula pendula	19	4	2004	86
FIBP19	FIBP1904	Finland	Betula pendula	19	4	2005	75
FIBP19	FIBP1904	Finland	Betula pendula	19	4	2006	98
FIBP19	FIBP1904	Finland	Betula pendula	19	4	2007	102
FIBP19	FIBP1904	Finland	Betula pendula	19	4	2008	118
FIBP19	FIBP1904	Finland	Betula pendula	19	4	2009	68
FIBP19	FIBP1904	Finland	Betula pendula	19	4	2010	66
FIBP19	FIBP1904	Finland	Betula pendula	19	4	2011	37
FIBP19	FIBP1904	Finland	Betula pendula	19	4	2012	34
FIBP19	FIBP1904	Finland	Betula pendula	19	4	2013	44
FIBP19	FIBP1904	Finland	Betula pendula	19	4	2014	23
FIBP19	FIBP1904	Finland	Betula pendula	19	4	2015	32
FIBP19	FIBP1905	Finland	Betula pendula	19	5	1961	91
FIBP19	FIBP1905	Finland	Betula pendula	19	5	1962	129
FIBP19	FIBP1905	Finland	Betula pendula	19	5	1963	184
FIBP19	FIBP1905	Finland	Betula pendula	19	5	1964	282
FIBP19	FIBP1905	Finland	Betula pendula	19	5	1965	292
FIBP19	FIBP1905	Finland	Betula pendula	19	5	1966	325
FIBP19	FIBP1905	Finland	Betula pendula	19	5	1967	214
FIBP19	FIBP1905	Finland	Betula pendula	19	5	1968	230
FIBP19	FIBP1905	Finland	Betula pendula	19	5	1969	177
FIBP19	FIBP1905	Finland	Betula pendula	19	5	1970	336
FIBP19	FIBP1905	Finland	Betula pendula	19	5	1971	249
FIBP19	FIBP1905	Finland	Betula pendula	19	5	1972	214
FIBP19	FIBP1905	Finland	Betula pendula	19	5	1973	247
FIBP19	FIBP1905	Finland	Betula pendula	19	5	1974	306
FIBP19	FIBP1905	Finland	Betula pendula	19	5	1975	267
FIBP19	FIBP1905	Finland	Betula pendula	19	5	1976	354
FIBP19	FIBP1905	Finland	Betula pendula	19	5	1977	297
FIBP19	FIBP1905	Finland	Betula pendula	19	5	1978	266
FIBP19	FIBP1905	Finland	Betula pendula	19	5	1979	291
FIBP19	FIBP1905	Finland	Betula pendula	19	5	1980	236
FIBP19	FIBP1905	Finland	Betula pendula	19	5	1981	231
FIBP19	FIBP1905	Finland	Betula pendula	19	5	1982	228
FIBP19	FIBP1905	Finland	Betula pendula	19	5	1983	193
FIBP19	FIBP1905	Finland	Betula pendula	19	5	1984	275
FIBP19	FIBP1905	Finland	Betula pendula	19	5	1985	162
FIBP19	FIBP1905	Finland	Betula pendula	19	5	1986	142
FIBP19	FIBP1905	Finland	Betula pendula	19	5	1987	117
FIBP19	FIBP1905	Finland	Betula pendula	19	5	1988	61
FIBP19	FIBP1905	Finland	Betula pendula	19	5	1989	46
FIBP19	FIBP1905	Finland	Betula pendula	19	5	1990	82
FIBP19	FIBP1905	Finland	Betula pendula	19	5	1991	50
FIBP19	FIBP1905	Finland	Betula pendula	19	5	1992	68
FIBP19	FIBP1905	Finland	Betula pendula	19	5	1993	88
FIBP19	FIBP1905	Finland	Betula pendula	19	5	1994	72
FIBP19	FIBP1905	Finland	Betula pendula	19	5	1995	70
FIBP19	FIBP1905	Finland	Betula pendula	19	5	1996	99
FIBP19	FIBP1905	Finland	Betula pendula	19	5	1997	87
FIBP19	FIBP1905	Finland	Betula pendula	19	5	1998	48
FIBP19	FIBP1905	Finland	Betula pendula	19	5	1999	59
FIBP19	FIBP1905	Finland	Betula pendula	19	5	2000	46
FIBP19	FIBP1905	Finland	Betula pendula	19	5	2001	82
FIBP19	FIBP1905	Finland	Betula pendula	19	5	2002	119
FIBP19	FIBP1905	Finland	Betula pendula	19	5	2003	87
FIBP19	FIBP1905	Finland	Betula pendula	19	5	2004	74
FIBP19	FIBP1905	Finland	Betula pendula	19	5	2005	111
FIBP19	FIBP1905	Finland	Betula pendula	19	5	2006	103
FIBP19	FIBP1905	Finland	Betula pendula	19	5	2007	124
FIBP19	FIBP1905	Finland	Betula pendula	19	5	2008	78
FIBP19	FIBP1905	Finland	Betula pendula	19	5	2009	74
FIBP19	FIBP1905	Finland	Betula pendula	19	5	2010	90
FIBP19	FIBP1905	Finland	Betula pendula	19	5	2011	101
FIBP19	FIBP1905	Finland	Betula pendula	19	5	2012	61
FIBP19	FIBP1905	Finland	Betula pendula	19	5	2013	115
FIBP19	FIBP1905	Finland	Betula pendula	19	5	2014	47
FIBP19	FIBP1905	Finland	Betula pendula	19	5	2015	36
FIBP19	FIBP1906	Finland	Betula pendula	19	6	1961	104
FIBP19	FIBP1906	Finland	Betula pendula	19	6	1962	184
FIBP19	FIBP1906	Finland	Betula pendula	19	6	1963	185
FIBP19	FIBP1906	Finland	Betula pendula	19	6	1964	119
FIBP19	FIBP1906	Finland	Betula pendula	19	6	1965	184
FIBP19	FIBP1906	Finland	Betula pendula	19	6	1966	195
FIBP19	FIBP1906	Finland	Betula pendula	19	6	1967	156
FIBP19	FIBP1906	Finland	Betula pendula	19	6	1968	179
FIBP19	FIBP1906	Finland	Betula pendula	19	6	1969	62
FIBP19	FIBP1906	Finland	Betula pendula	19	6	1970	104
FIBP19	FIBP1906	Finland	Betula pendula	19	6	1971	150
FIBP19	FIBP1906	Finland	Betula pendula	19	6	1972	164
FIBP19	FIBP1906	Finland	Betula pendula	19	6	1973	197
FIBP19	FIBP1906	Finland	Betula pendula	19	6	1974	194
FIBP19	FIBP1906	Finland	Betula pendula	19	6	1975	161
FIBP19	FIBP1906	Finland	Betula pendula	19	6	1976	219
FIBP19	FIBP1906	Finland	Betula pendula	19	6	1977	188
FIBP19	FIBP1906	Finland	Betula pendula	19	6	1978	141
FIBP19	FIBP1906	Finland	Betula pendula	19	6	1979	179
FIBP19	FIBP1906	Finland	Betula pendula	19	6	1980	188
FIBP19	FIBP1906	Finland	Betula pendula	19	6	1981	194
FIBP19	FIBP1906	Finland	Betula pendula	19	6	1982	143
FIBP19	FIBP1906	Finland	Betula pendula	19	6	1983	182
FIBP19	FIBP1906	Finland	Betula pendula	19	6	1984	189
FIBP19	FIBP1906	Finland	Betula pendula	19	6	1985	114
FIBP19	FIBP1906	Finland	Betula pendula	19	6	1986	102
FIBP19	FIBP1906	Finland	Betula pendula	19	6	1987	75
FIBP19	FIBP1906	Finland	Betula pendula	19	6	1988	78
FIBP19	FIBP1906	Finland	Betula pendula	19	6	1989	122
FIBP19	FIBP1906	Finland	Betula pendula	19	6	1990	152
FIBP19	FIBP1906	Finland	Betula pendula	19	6	1991	131
FIBP19	FIBP1906	Finland	Betula pendula	19	6	1992	165
FIBP19	FIBP1906	Finland	Betula pendula	19	6	1993	107
FIBP19	FIBP1906	Finland	Betula pendula	19	6	1994	114
FIBP19	FIBP1906	Finland	Betula pendula	19	6	1995	107
FIBP19	FIBP1906	Finland	Betula pendula	19	6	1996	96
FIBP19	FIBP1906	Finland	Betula pendula	19	6	1997	79
FIBP19	FIBP1906	Finland	Betula pendula	19	6	1998	45
FIBP19	FIBP1906	Finland	Betula pendula	19	6	1999	75
FIBP19	FIBP1906	Finland	Betula pendula	19	6	2000	56
FIBP19	FIBP1906	Finland	Betula pendula	19	6	2001	196
FIBP19	FIBP1906	Finland	Betula pendula	19	6	2002	93
FIBP19	FIBP1906	Finland	Betula pendula	19	6	2003	53
FIBP19	FIBP1906	Finland	Betula pendula	19	6	2004	66
FIBP19	FIBP1906	Finland	Betula pendula	19	6	2005	110
FIBP19	FIBP1906	Finland	Betula pendula	19	6	2006	90
FIBP19	FIBP1906	Finland	Betula pendula	19	6	2007	92
FIBP19	FIBP1906	Finland	Betula pendula	19	6	2008	84
FIBP19	FIBP1906	Finland	Betula pendula	19	6	2009	112
FIBP19	FIBP1906	Finland	Betula pendula	19	6	2010	123
FIBP19	FIBP1906	Finland	Betula pendula	19	6	2011	55
FIBP19	FIBP1906	Finland	Betula pendula	19	6	2012	48
FIBP19	FIBP1906	Finland	Betula pendula	19	6	2013	158
FIBP19	FIBP1906	Finland	Betula pendula	19	6	2014	102
FIBP19	FIBP1906	Finland	Betula pendula	19	6	2015	29
FIBP19	FIBP1907	Finland	Betula pendula	19	7	1972	250
FIBP19	FIBP1907	Finland	Betula pendula	19	7	1973	273
FIBP19	FIBP1907	Finland	Betula pendula	19	7	1974	329
FIBP19	FIBP1907	Finland	Betula pendula	19	7	1975	311
FIBP19	FIBP1907	Finland	Betula pendula	19	7	1976	243
FIBP19	FIBP1907	Finland	Betula pendula	19	7	1977	396
FIBP19	FIBP1907	Finland	Betula pendula	19	7	1978	320
FIBP19	FIBP1907	Finland	Betula pendula	19	7	1979	370
FIBP19	FIBP1907	Finland	Betula pendula	19	7	1980	371
FIBP19	FIBP1907	Finland	Betula pendula	19	7	1981	303
FIBP19	FIBP1907	Finland	Betula pendula	19	7	1982	324
FIBP19	FIBP1907	Finland	Betula pendula	19	7	1983	271
FIBP19	FIBP1907	Finland	Betula pendula	19	7	1984	245
FIBP19	FIBP1907	Finland	Betula pendula	19	7	1985	312
FIBP19	FIBP1907	Finland	Betula pendula	19	7	1986	281
FIBP19	FIBP1907	Finland	Betula pendula	19	7	1987	243
FIBP19	FIBP1907	Finland	Betula pendula	19	7	1988	156
FIBP19	FIBP1907	Finland	Betula pendula	19	7	1989	134
FIBP19	FIBP1907	Finland	Betula pendula	19	7	1990	203
FIBP19	FIBP1907	Finland	Betula pendula	19	7	1991	183
FIBP19	FIBP1907	Finland	Betula pendula	19	7	1992	171
FIBP19	FIBP1907	Finland	Betula pendula	19	7	1993	126
FIBP19	FIBP1907	Finland	Betula pendula	19	7	1994	142
FIBP19	FIBP1907	Finland	Betula pendula	19	7	1995	125
FIBP19	FIBP1907	Finland	Betula pendula	19	7	1996	189
FIBP19	FIBP1907	Finland	Betula pendula	19	7	1997	138
FIBP19	FIBP1907	Finland	Betula pendula	19	7	1998	119
FIBP19	FIBP1907	Finland	Betula pendula	19	7	1999	130
FIBP19	FIBP1907	Finland	Betula pendula	19	7	2000	151
FIBP19	FIBP1907	Finland	Betula pendula	19	7	2001	188
FIBP19	FIBP1907	Finland	Betula pendula	19	7	2002	211
FIBP19	FIBP1907	Finland	Betula pendula	19	7	2003	198
FIBP19	FIBP1907	Finland	Betula pendula	19	7	2004	146
FIBP19	FIBP1907	Finland	Betula pendula	19	7	2005	187
FIBP19	FIBP1907	Finland	Betula pendula	19	7	2006	176
FIBP19	FIBP1907	Finland	Betula pendula	19	7	2007	204
FIBP19	FIBP1907	Finland	Betula pendula	19	7	2008	177
FIBP19	FIBP1907	Finland	Betula pendula	19	7	2009	189
FIBP19	FIBP1907	Finland	Betula pendula	19	7	2010	183
FIBP19	FIBP1907	Finland	Betula pendula	19	7	2011	126
FIBP19	FIBP1907	Finland	Betula pendula	19	7	2012	82
FIBP19	FIBP1907	Finland	Betula pendula	19	7	2013	137
FIBP19	FIBP1907	Finland	Betula pendula	19	7	2014	131
FIBP19	FIBP1907	Finland	Betula pendula	19	7	2015	41
FIBP19	FIBP1908	Finland	Betula pendula	19	8	1965	64
FIBP19	FIBP1908	Finland	Betula pendula	19	8	1966	55
FIBP19	FIBP1908	Finland	Betula pendula	19	8	1967	81
FIBP19	FIBP1908	Finland	Betula pendula	19	8	1968	104
FIBP19	FIBP1908	Finland	Betula pendula	19	8	1969	99
FIBP19	FIBP1908	Finland	Betula pendula	19	8	1970	85
FIBP19	FIBP1908	Finland	Betula pendula	19	8	1971	171
FIBP19	FIBP1908	Finland	Betula pendula	19	8	1972	171
FIBP19	FIBP1908	Finland	Betula pendula	19	8	1973	229
FIBP19	FIBP1908	Finland	Betula pendula	19	8	1974	146
FIBP19	FIBP1908	Finland	Betula pendula	19	8	1975	218
FIBP19	FIBP1908	Finland	Betula pendula	19	8	1976	273
FIBP19	FIBP1908	Finland	Betula pendula	19	8	1977	244
FIBP19	FIBP1908	Finland	Betula pendula	19	8	1978	222
FIBP19	FIBP1908	Finland	Betula pendula	19	8	1979	250
FIBP19	FIBP1908	Finland	Betula pendula	19	8	1980	176
FIBP19	FIBP1908	Finland	Betula pendula	19	8	1981	262
FIBP19	FIBP1908	Finland	Betula pendula	19	8	1982	164
FIBP19	FIBP1908	Finland	Betula pendula	19	8	1983	185
FIBP19	FIBP1908	Finland	Betula pendula	19	8	1984	245
FIBP19	FIBP1908	Finland	Betula pendula	19	8	1985	235
FIBP19	FIBP1908	Finland	Betula pendula	19	8	1986	191
FIBP19	FIBP1908	Finland	Betula pendula	19	8	1987	129
FIBP19	FIBP1908	Finland	Betula pendula	19	8	1988	129
FIBP19	FIBP1908	Finland	Betula pendula	19	8	1989	112
FIBP19	FIBP1908	Finland	Betula pendula	19	8	1990	140
FIBP19	FIBP1908	Finland	Betula pendula	19	8	1991	127
FIBP19	FIBP1908	Finland	Betula pendula	19	8	1992	137
FIBP19	FIBP1908	Finland	Betula pendula	19	8	1993	106
FIBP19	FIBP1908	Finland	Betula pendula	19	8	1994	65
FIBP19	FIBP1908	Finland	Betula pendula	19	8	1995	54
FIBP19	FIBP1908	Finland	Betula pendula	19	8	1996	124
FIBP19	FIBP1908	Finland	Betula pendula	19	8	1997	124
FIBP19	FIBP1908	Finland	Betula pendula	19	8	1998	162
FIBP19	FIBP1908	Finland	Betula pendula	19	8	1999	135
FIBP19	FIBP1908	Finland	Betula pendula	19	8	2000	192
FIBP19	FIBP1908	Finland	Betula pendula	19	8	2001	238
FIBP19	FIBP1908	Finland	Betula pendula	19	8	2002	234
FIBP19	FIBP1908	Finland	Betula pendula	19	8	2003	188
FIBP19	FIBP1908	Finland	Betula pendula	19	8	2004	142
FIBP19	FIBP1908	Finland	Betula pendula	19	8	2005	201
FIBP19	FIBP1908	Finland	Betula pendula	19	8	2006	218
FIBP19	FIBP1908	Finland	Betula pendula	19	8	2007	214
FIBP19	FIBP1908	Finland	Betula pendula	19	8	2008	236
FIBP19	FIBP1908	Finland	Betula pendula	19	8	2009	177
FIBP19	FIBP1908	Finland	Betula pendula	19	8	2010	199
FIBP19	FIBP1908	Finland	Betula pendula	19	8	2011	230
FIBP19	FIBP1908	Finland	Betula pendula	19	8	2012	186
FIBP19	FIBP1908	Finland	Betula pendula	19	8	2013	175
FIBP19	FIBP1908	Finland	Betula pendula	19	8	2014	215
FIBP19	FIBP1908	Finland	Betula pendula	19	8	2015	206
FIBP19	FIBP1909	Finland	Betula pendula	19	9	1966	411
FIBP19	FIBP1909	Finland	Betula pendula	19	9	1967	397
FIBP19	FIBP1909	Finland	Betula pendula	19	9	1968	379
FIBP19	FIBP1909	Finland	Betula pendula	19	9	1969	392
FIBP19	FIBP1909	Finland	Betula pendula	19	9	1970	303
FIBP19	FIBP1909	Finland	Betula pendula	19	9	1971	299
FIBP19	FIBP1909	Finland	Betula pendula	19	9	1972	205
FIBP19	FIBP1909	Finland	Betula pendula	19	9	1973	170
FIBP19	FIBP1909	Finland	Betula pendula	19	9	1974	260
FIBP19	FIBP1909	Finland	Betula pendula	19	9	1975	120
FIBP19	FIBP1909	Finland	Betula pendula	19	9	1976	254
FIBP19	FIBP1909	Finland	Betula pendula	19	9	1977	235
FIBP19	FIBP1909	Finland	Betula pendula	19	9	1978	223
FIBP19	FIBP1909	Finland	Betula pendula	19	9	1979	283
FIBP19	FIBP1909	Finland	Betula pendula	19	9	1980	184
FIBP19	FIBP1909	Finland	Betula pendula	19	9	1981	179
FIBP19	FIBP1909	Finland	Betula pendula	19	9	1982	163
FIBP19	FIBP1909	Finland	Betula pendula	19	9	1983	78
FIBP19	FIBP1909	Finland	Betula pendula	19	9	1984	153
FIBP19	FIBP1909	Finland	Betula pendula	19	9	1985	153
FIBP19	FIBP1909	Finland	Betula pendula	19	9	1986	162
FIBP19	FIBP1909	Finland	Betula pendula	19	9	1987	90
FIBP19	FIBP1909	Finland	Betula pendula	19	9	1988	60
FIBP19	FIBP1909	Finland	Betula pendula	19	9	1989	73
FIBP19	FIBP1909	Finland	Betula pendula	19	9	1990	112
FIBP19	FIBP1909	Finland	Betula pendula	19	9	1991	95
FIBP19	FIBP1909	Finland	Betula pendula	19	9	1992	107
FIBP19	FIBP1909	Finland	Betula pendula	19	9	1993	103
FIBP19	FIBP1909	Finland	Betula pendula	19	9	1994	81
FIBP19	FIBP1909	Finland	Betula pendula	19	9	1995	75
FIBP19	FIBP1909	Finland	Betula pendula	19	9	1996	80
FIBP19	FIBP1909	Finland	Betula pendula	19	9	1997	71
FIBP19	FIBP1909	Finland	Betula pendula	19	9	1998	55
FIBP19	FIBP1909	Finland	Betula pendula	19	9	1999	91
FIBP19	FIBP1909	Finland	Betula pendula	19	9	2000	100
FIBP19	FIBP1909	Finland	Betula pendula	19	9	2001	128
FIBP19	FIBP1909	Finland	Betula pendula	19	9	2002	175
FIBP19	FIBP1909	Finland	Betula pendula	19	9	2003	131
FIBP19	FIBP1909	Finland	Betula pendula	19	9	2004	104
FIBP19	FIBP1909	Finland	Betula pendula	19	9	2005	138
FIBP19	FIBP1909	Finland	Betula pendula	19	9	2006	140
FIBP19	FIBP1909	Finland	Betula pendula	19	9	2007	116
FIBP19	FIBP1909	Finland	Betula pendula	19	9	2008	88
FIBP19	FIBP1909	Finland	Betula pendula	19	9	2009	112
FIBP19	FIBP1909	Finland	Betula pendula	19	9	2010	95
FIBP19	FIBP1909	Finland	Betula pendula	19	9	2011	94
FIBP19	FIBP1909	Finland	Betula pendula	19	9	2012	50
FIBP19	FIBP1909	Finland	Betula pendula	19	9	2013	76
FIBP19	FIBP1909	Finland	Betula pendula	19	9	2014	114
FIBP19	FIBP1909	Finland	Betula pendula	19	9	2015	79
FIBP19	FIBP1910	Finland	Betula pendula	19	10	1969	97
FIBP19	FIBP1910	Finland	Betula pendula	19	10	1970	62
FIBP19	FIBP1910	Finland	Betula pendula	19	10	1971	104
FIBP19	FIBP1910	Finland	Betula pendula	19	10	1972	110
FIBP19	FIBP1910	Finland	Betula pendula	19	10	1973	144
FIBP19	FIBP1910	Finland	Betula pendula	19	10	1974	211
FIBP19	FIBP1910	Finland	Betula pendula	19	10	1975	149
FIBP19	FIBP1910	Finland	Betula pendula	19	10	1976	184
FIBP19	FIBP1910	Finland	Betula pendula	19	10	1977	264
FIBP19	FIBP1910	Finland	Betula pendula	19	10	1978	204
FIBP19	FIBP1910	Finland	Betula pendula	19	10	1979	255
FIBP19	FIBP1910	Finland	Betula pendula	19	10	1980	299
FIBP19	FIBP1910	Finland	Betula pendula	19	10	1981	390
FIBP19	FIBP1910	Finland	Betula pendula	19	10	1982	257
FIBP19	FIBP1910	Finland	Betula pendula	19	10	1983	251
FIBP19	FIBP1910	Finland	Betula pendula	19	10	1984	321
FIBP19	FIBP1910	Finland	Betula pendula	19	10	1985	334
FIBP19	FIBP1910	Finland	Betula pendula	19	10	1986	294
FIBP19	FIBP1910	Finland	Betula pendula	19	10	1987	209
FIBP19	FIBP1910	Finland	Betula pendula	19	10	1988	181
FIBP19	FIBP1910	Finland	Betula pendula	19	10	1989	184
FIBP19	FIBP1910	Finland	Betula pendula	19	10	1990	221
FIBP19	FIBP1910	Finland	Betula pendula	19	10	1991	204
FIBP19	FIBP1910	Finland	Betula pendula	19	10	1992	285
FIBP19	FIBP1910	Finland	Betula pendula	19	10	1993	263
FIBP19	FIBP1910	Finland	Betula pendula	19	10	1994	187
FIBP19	FIBP1910	Finland	Betula pendula	19	10	1995	152
FIBP19	FIBP1910	Finland	Betula pendula	19	10	1996	214
FIBP19	FIBP1910	Finland	Betula pendula	19	10	1997	302
FIBP19	FIBP1910	Finland	Betula pendula	19	10	1998	257
FIBP19	FIBP1910	Finland	Betula pendula	19	10	1999	236
FIBP19	FIBP1910	Finland	Betula pendula	19	10	2000	212
FIBP19	FIBP1910	Finland	Betula pendula	19	10	2001	273
FIBP19	FIBP1910	Finland	Betula pendula	19	10	2002	299
FIBP19	FIBP1910	Finland	Betula pendula	19	10	2003	255
FIBP19	FIBP1910	Finland	Betula pendula	19	10	2004	159
FIBP19	FIBP1910	Finland	Betula pendula	19	10	2005	218
FIBP19	FIBP1910	Finland	Betula pendula	19	10	2006	186
FIBP19	FIBP1910	Finland	Betula pendula	19	10	2007	234
FIBP19	FIBP1910	Finland	Betula pendula	19	10	2008	251
FIBP19	FIBP1910	Finland	Betula pendula	19	10	2009	220
FIBP19	FIBP1910	Finland	Betula pendula	19	10	2010	229
FIBP19	FIBP1910	Finland	Betula pendula	19	10	2011	152
FIBP19	FIBP1910	Finland	Betula pendula	19	10	2012	131
FIBP19	FIBP1910	Finland	Betula pendula	19	10	2013	154
FIBP19	FIBP1910	Finland	Betula pendula	19	10	2014	189
FIBP19	FIBP1910	Finland	Betula pendula	19	10	2015	101
FIBP19	FIBP1911	Finland	Betula pendula	19	11	1973	106
FIBP19	FIBP1911	Finland	Betula pendula	19	11	1974	121
FIBP19	FIBP1911	Finland	Betula pendula	19	11	1975	162
FIBP19	FIBP1911	Finland	Betula pendula	19	11	1976	197
FIBP19	FIBP1911	Finland	Betula pendula	19	11	1977	143
FIBP19	FIBP1911	Finland	Betula pendula	19	11	1978	156
FIBP19	FIBP1911	Finland	Betula pendula	19	11	1979	211
FIBP19	FIBP1911	Finland	Betula pendula	19	11	1980	207
FIBP19	FIBP1911	Finland	Betula pendula	19	11	1981	217
FIBP19	FIBP1911	Finland	Betula pendula	19	11	1982	237
FIBP19	FIBP1911	Finland	Betula pendula	19	11	1983	301
FIBP19	FIBP1911	Finland	Betula pendula	19	11	1984	270
FIBP19	FIBP1911	Finland	Betula pendula	19	11	1985	266
FIBP19	FIBP1911	Finland	Betula pendula	19	11	1986	209
FIBP19	FIBP1911	Finland	Betula pendula	19	11	1987	108
FIBP19	FIBP1911	Finland	Betula pendula	19	11	1988	99
FIBP19	FIBP1911	Finland	Betula pendula	19	11	1989	110
FIBP19	FIBP1911	Finland	Betula pendula	19	11	1990	137
FIBP19	FIBP1911	Finland	Betula pendula	19	11	1991	142
FIBP19	FIBP1911	Finland	Betula pendula	19	11	1992	161
FIBP19	FIBP1911	Finland	Betula pendula	19	11	1993	147
FIBP19	FIBP1911	Finland	Betula pendula	19	11	1994	176
FIBP19	FIBP1911	Finland	Betula pendula	19	11	1995	137
FIBP19	FIBP1911	Finland	Betula pendula	19	11	1996	195
FIBP19	FIBP1911	Finland	Betula pendula	19	11	1997	200
FIBP19	FIBP1911	Finland	Betula pendula	19	11	1998	176
FIBP19	FIBP1911	Finland	Betula pendula	19	11	1999	191
FIBP19	FIBP1911	Finland	Betula pendula	19	11	2000	145
FIBP19	FIBP1911	Finland	Betula pendula	19	11	2001	218
FIBP19	FIBP1911	Finland	Betula pendula	19	11	2002	213
FIBP19	FIBP1911	Finland	Betula pendula	19	11	2003	181
FIBP19	FIBP1911	Finland	Betula pendula	19	11	2004	162
FIBP19	FIBP1911	Finland	Betula pendula	19	11	2005	224
FIBP19	FIBP1911	Finland	Betula pendula	19	11	2006	186
FIBP19	FIBP1911	Finland	Betula pendula	19	11	2007	227
FIBP19	FIBP1911	Finland	Betula pendula	19	11	2008	180
FIBP19	FIBP1911	Finland	Betula pendula	19	11	2009	169
FIBP19	FIBP1911	Finland	Betula pendula	19	11	2010	207
FIBP19	FIBP1911	Finland	Betula pendula	19	11	2011	127
FIBP19	FIBP1911	Finland	Betula pendula	19	11	2012	105
FIBP19	FIBP1911	Finland	Betula pendula	19	11	2013	160
FIBP19	FIBP1911	Finland	Betula pendula	19	11	2014	125
FIBP19	FIBP1911	Finland	Betula pendula	19	11	2015	117
FIBP19	FIBP1912	Finland	Betula pendula	19	12	1972	133
FIBP19	FIBP1912	Finland	Betula pendula	19	12	1973	218
FIBP19	FIBP1912	Finland	Betula pendula	19	12	1974	184
FIBP19	FIBP1912	Finland	Betula pendula	19	12	1975	146
FIBP19	FIBP1912	Finland	Betula pendula	19	12	1976	236
FIBP19	FIBP1912	Finland	Betula pendula	19	12	1977	149
FIBP19	FIBP1912	Finland	Betula pendula	19	12	1978	154
FIBP19	FIBP1912	Finland	Betula pendula	19	12	1979	188
FIBP19	FIBP1912	Finland	Betula pendula	19	12	1980	132
FIBP19	FIBP1912	Finland	Betula pendula	19	12	1981	164
FIBP19	FIBP1912	Finland	Betula pendula	19	12	1982	193
FIBP19	FIBP1912	Finland	Betula pendula	19	12	1983	182
FIBP19	FIBP1912	Finland	Betula pendula	19	12	1984	233
FIBP19	FIBP1912	Finland	Betula pendula	19	12	1985	219
FIBP19	FIBP1912	Finland	Betula pendula	19	12	1986	178
FIBP19	FIBP1912	Finland	Betula pendula	19	12	1987	113
FIBP19	FIBP1912	Finland	Betula pendula	19	12	1988	124
FIBP19	FIBP1912	Finland	Betula pendula	19	12	1989	77
FIBP19	FIBP1912	Finland	Betula pendula	19	12	1990	121
FIBP19	FIBP1912	Finland	Betula pendula	19	12	1991	109
FIBP19	FIBP1912	Finland	Betula pendula	19	12	1992	167
FIBP19	FIBP1912	Finland	Betula pendula	19	12	1993	163
FIBP19	FIBP1912	Finland	Betula pendula	19	12	1994	119
FIBP19	FIBP1912	Finland	Betula pendula	19	12	1995	97
FIBP19	FIBP1912	Finland	Betula pendula	19	12	1996	189
FIBP19	FIBP1912	Finland	Betula pendula	19	12	1997	223
FIBP19	FIBP1912	Finland	Betula pendula	19	12	1998	207
FIBP19	FIBP1912	Finland	Betula pendula	19	12	1999	223
FIBP19	FIBP1912	Finland	Betula pendula	19	12	2000	201
FIBP19	FIBP1912	Finland	Betula pendula	19	12	2001	226
FIBP19	FIBP1912	Finland	Betula pendula	19	12	2002	304
FIBP19	FIBP1912	Finland	Betula pendula	19	12	2003	311
FIBP19	FIBP1912	Finland	Betula pendula	19	12	2004	245
FIBP19	FIBP1912	Finland	Betula pendula	19	12	2005	249
FIBP19	FIBP1912	Finland	Betula pendula	19	12	2006	241
FIBP19	FIBP1912	Finland	Betula pendula	19	12	2007	252
FIBP19	FIBP1912	Finland	Betula pendula	19	12	2008	235
FIBP19	FIBP1912	Finland	Betula pendula	19	12	2009	246
FIBP19	FIBP1912	Finland	Betula pendula	19	12	2010	239
FIBP19	FIBP1912	Finland	Betula pendula	19	12	2011	196
FIBP19	FIBP1912	Finland	Betula pendula	19	12	2012	157
FIBP19	FIBP1912	Finland	Betula pendula	19	12	2013	221
FIBP19	FIBP1912	Finland	Betula pendula	19	12	2014	217
FIBP19	FIBP1912	Finland	Betula pendula	19	12	2015	152
FIBP19	FIBP1913	Finland	Betula pendula	19	13	1971	216
FIBP19	FIBP1913	Finland	Betula pendula	19	13	1972	237
FIBP19	FIBP1913	Finland	Betula pendula	19	13	1973	237
FIBP19	FIBP1913	Finland	Betula pendula	19	13	1974	282
FIBP19	FIBP1913	Finland	Betula pendula	19	13	1975	269
FIBP19	FIBP1913	Finland	Betula pendula	19	13	1976	325
FIBP19	FIBP1913	Finland	Betula pendula	19	13	1977	337
FIBP19	FIBP1913	Finland	Betula pendula	19	13	1978	325
FIBP19	FIBP1913	Finland	Betula pendula	19	13	1979	278
FIBP19	FIBP1913	Finland	Betula pendula	19	13	1980	166
FIBP19	FIBP1913	Finland	Betula pendula	19	13	1981	146
FIBP19	FIBP1913	Finland	Betula pendula	19	13	1982	190
FIBP19	FIBP1913	Finland	Betula pendula	19	13	1983	144
FIBP19	FIBP1913	Finland	Betula pendula	19	13	1984	159
FIBP19	FIBP1913	Finland	Betula pendula	19	13	1985	172
FIBP19	FIBP1913	Finland	Betula pendula	19	13	1986	167
FIBP19	FIBP1913	Finland	Betula pendula	19	13	1987	132
FIBP19	FIBP1913	Finland	Betula pendula	19	13	1988	127
FIBP19	FIBP1913	Finland	Betula pendula	19	13	1989	125
FIBP19	FIBP1913	Finland	Betula pendula	19	13	1990	143
FIBP19	FIBP1913	Finland	Betula pendula	19	13	1991	136
FIBP19	FIBP1913	Finland	Betula pendula	19	13	1992	143
FIBP19	FIBP1913	Finland	Betula pendula	19	13	1993	158
FIBP19	FIBP1913	Finland	Betula pendula	19	13	1994	103
FIBP19	FIBP1913	Finland	Betula pendula	19	13	1995	106
FIBP19	FIBP1913	Finland	Betula pendula	19	13	1996	153
FIBP19	FIBP1913	Finland	Betula pendula	19	13	1997	138
FIBP19	FIBP1913	Finland	Betula pendula	19	13	1998	128
FIBP19	FIBP1913	Finland	Betula pendula	19	13	1999	129
FIBP19	FIBP1913	Finland	Betula pendula	19	13	2000	123
FIBP19	FIBP1913	Finland	Betula pendula	19	13	2001	170
FIBP19	FIBP1913	Finland	Betula pendula	19	13	2002	212
FIBP19	FIBP1913	Finland	Betula pendula	19	13	2003	173
FIBP19	FIBP1913	Finland	Betula pendula	19	13	2004	141
FIBP19	FIBP1913	Finland	Betula pendula	19	13	2005	239
FIBP19	FIBP1913	Finland	Betula pendula	19	13	2006	209
FIBP19	FIBP1913	Finland	Betula pendula	19	13	2007	224
FIBP19	FIBP1913	Finland	Betula pendula	19	13	2008	193
FIBP19	FIBP1913	Finland	Betula pendula	19	13	2009	216
FIBP19	FIBP1913	Finland	Betula pendula	19	13	2010	229
FIBP19	FIBP1913	Finland	Betula pendula	19	13	2011	151
FIBP19	FIBP1913	Finland	Betula pendula	19	13	2012	153
FIBP19	FIBP1913	Finland	Betula pendula	19	13	2013	163
FIBP19	FIBP1913	Finland	Betula pendula	19	13	2014	191
FIBP19	FIBP1913	Finland	Betula pendula	19	13	2015	145
FIBP19	FIBP1914	Finland	Betula pendula	19	14	1990	143
FIBP19	FIBP1914	Finland	Betula pendula	19	14	1991	162
FIBP19	FIBP1914	Finland	Betula pendula	19	14	1992	120
FIBP19	FIBP1914	Finland	Betula pendula	19	14	1993	200
FIBP19	FIBP1914	Finland	Betula pendula	19	14	1994	328
FIBP19	FIBP1914	Finland	Betula pendula	19	14	1995	261
FIBP19	FIBP1914	Finland	Betula pendula	19	14	1996	190
FIBP19	FIBP1914	Finland	Betula pendula	19	14	1997	404
FIBP19	FIBP1914	Finland	Betula pendula	19	14	1998	381
FIBP19	FIBP1914	Finland	Betula pendula	19	14	1999	378
FIBP19	FIBP1914	Finland	Betula pendula	19	14	2000	387
FIBP19	FIBP1914	Finland	Betula pendula	19	14	2001	343
FIBP19	FIBP1914	Finland	Betula pendula	19	14	2002	404
FIBP19	FIBP1914	Finland	Betula pendula	19	14	2003	332
FIBP19	FIBP1914	Finland	Betula pendula	19	14	2004	242
FIBP19	FIBP1914	Finland	Betula pendula	19	14	2005	265
FIBP19	FIBP1914	Finland	Betula pendula	19	14	2006	313
FIBP19	FIBP1914	Finland	Betula pendula	19	14	2007	346
FIBP19	FIBP1914	Finland	Betula pendula	19	14	2008	292
FIBP19	FIBP1914	Finland	Betula pendula	19	14	2009	305
FIBP19	FIBP1914	Finland	Betula pendula	19	14	2010	341
FIBP19	FIBP1914	Finland	Betula pendula	19	14	2011	298
FIBP19	FIBP1914	Finland	Betula pendula	19	14	2012	218
FIBP19	FIBP1914	Finland	Betula pendula	19	14	2013	260
FIBP19	FIBP1914	Finland	Betula pendula	19	14	2014	276
FIBP19	FIBP1914	Finland	Betula pendula	19	14	2015	187
FIBP19	FIBP1915	Finland	Betula pendula	19	15	1969	77
FIBP19	FIBP1915	Finland	Betula pendula	19	15	1970	56
FIBP19	FIBP1915	Finland	Betula pendula	19	15	1971	105
FIBP19	FIBP1915	Finland	Betula pendula	19	15	1972	152
FIBP19	FIBP1915	Finland	Betula pendula	19	15	1973	140
FIBP19	FIBP1915	Finland	Betula pendula	19	15	1974	188
FIBP19	FIBP1915	Finland	Betula pendula	19	15	1975	145
FIBP19	FIBP1915	Finland	Betula pendula	19	15	1976	170
FIBP19	FIBP1915	Finland	Betula pendula	19	15	1977	160
FIBP19	FIBP1915	Finland	Betula pendula	19	15	1978	131
FIBP19	FIBP1915	Finland	Betula pendula	19	15	1979	139
FIBP19	FIBP1915	Finland	Betula pendula	19	15	1980	199
FIBP19	FIBP1915	Finland	Betula pendula	19	15	1981	230
FIBP19	FIBP1915	Finland	Betula pendula	19	15	1982	420
FIBP19	FIBP1915	Finland	Betula pendula	19	15	1983	315
FIBP19	FIBP1915	Finland	Betula pendula	19	15	1984	430
FIBP19	FIBP1915	Finland	Betula pendula	19	15	1985	297
FIBP19	FIBP1915	Finland	Betula pendula	19	15	1986	282
FIBP19	FIBP1915	Finland	Betula pendula	19	15	1987	131
FIBP19	FIBP1915	Finland	Betula pendula	19	15	1988	141
FIBP19	FIBP1915	Finland	Betula pendula	19	15	1989	163
FIBP19	FIBP1915	Finland	Betula pendula	19	15	1990	185
FIBP19	FIBP1915	Finland	Betula pendula	19	15	1991	134
FIBP19	FIBP1915	Finland	Betula pendula	19	15	1992	188
FIBP19	FIBP1915	Finland	Betula pendula	19	15	1993	216
FIBP19	FIBP1915	Finland	Betula pendula	19	15	1994	155
FIBP19	FIBP1915	Finland	Betula pendula	19	15	1995	142
FIBP19	FIBP1915	Finland	Betula pendula	19	15	1996	176
FIBP19	FIBP1915	Finland	Betula pendula	19	15	1997	257
FIBP19	FIBP1915	Finland	Betula pendula	19	15	1998	241
FIBP19	FIBP1915	Finland	Betula pendula	19	15	1999	250
FIBP19	FIBP1915	Finland	Betula pendula	19	15	2000	273
FIBP19	FIBP1915	Finland	Betula pendula	19	15	2001	272
FIBP19	FIBP1915	Finland	Betula pendula	19	15	2002	296
FIBP19	FIBP1915	Finland	Betula pendula	19	15	2003	252
FIBP19	FIBP1915	Finland	Betula pendula	19	15	2004	183
FIBP19	FIBP1915	Finland	Betula pendula	19	15	2005	214
FIBP19	FIBP1915	Finland	Betula pendula	19	15	2006	219
FIBP19	FIBP1915	Finland	Betula pendula	19	15	2007	221
FIBP19	FIBP1915	Finland	Betula pendula	19	15	2008	211
FIBP19	FIBP1915	Finland	Betula pendula	19	15	2009	218
FIBP19	FIBP1915	Finland	Betula pendula	19	15	2010	258
FIBP19	FIBP1915	Finland	Betula pendula	19	15	2011	183
FIBP19	FIBP1915	Finland	Betula pendula	19	15	2012	186
FIBP19	FIBP1915	Finland	Betula pendula	19	15	2013	212
FIBP19	FIBP1915	Finland	Betula pendula	19	15	2014	269
FIBP19	FIBP1915	Finland	Betula pendula	19	15	2015	124
FIBP19	FIBP1916	Finland	Betula pendula	19	16	1962	145
FIBP19	FIBP1916	Finland	Betula pendula	19	16	1963	113
FIBP19	FIBP1916	Finland	Betula pendula	19	16	1964	183
FIBP19	FIBP1916	Finland	Betula pendula	19	16	1965	175
FIBP19	FIBP1916	Finland	Betula pendula	19	16	1966	139
FIBP19	FIBP1916	Finland	Betula pendula	19	16	1967	142
FIBP19	FIBP1916	Finland	Betula pendula	19	16	1968	285
FIBP19	FIBP1916	Finland	Betula pendula	19	16	1969	287
FIBP19	FIBP1916	Finland	Betula pendula	19	16	1970	338
FIBP19	FIBP1916	Finland	Betula pendula	19	16	1971	343
FIBP19	FIBP1916	Finland	Betula pendula	19	16	1972	451
FIBP19	FIBP1916	Finland	Betula pendula	19	16	1973	449
FIBP19	FIBP1916	Finland	Betula pendula	19	16	1974	419
FIBP19	FIBP1916	Finland	Betula pendula	19	16	1975	396
FIBP19	FIBP1916	Finland	Betula pendula	19	16	1976	436
FIBP19	FIBP1916	Finland	Betula pendula	19	16	1977	352
FIBP19	FIBP1916	Finland	Betula pendula	19	16	1978	341
FIBP19	FIBP1916	Finland	Betula pendula	19	16	1979	376
FIBP19	FIBP1916	Finland	Betula pendula	19	16	1980	325
FIBP19	FIBP1916	Finland	Betula pendula	19	16	1981	420
FIBP19	FIBP1916	Finland	Betula pendula	19	16	1982	281
FIBP19	FIBP1916	Finland	Betula pendula	19	16	1983	274
FIBP19	FIBP1916	Finland	Betula pendula	19	16	1984	292
FIBP19	FIBP1916	Finland	Betula pendula	19	16	1985	316
FIBP19	FIBP1916	Finland	Betula pendula	19	16	1986	254
FIBP19	FIBP1916	Finland	Betula pendula	19	16	1987	168
FIBP19	FIBP1916	Finland	Betula pendula	19	16	1988	120
FIBP19	FIBP1916	Finland	Betula pendula	19	16	1989	96
FIBP19	FIBP1916	Finland	Betula pendula	19	16	1990	108
FIBP19	FIBP1916	Finland	Betula pendula	19	16	1991	126
FIBP19	FIBP1916	Finland	Betula pendula	19	16	1992	153
FIBP19	FIBP1916	Finland	Betula pendula	19	16	1993	164
FIBP19	FIBP1916	Finland	Betula pendula	19	16	1994	148
FIBP19	FIBP1916	Finland	Betula pendula	19	16	1995	129
FIBP19	FIBP1916	Finland	Betula pendula	19	16	1996	198
FIBP19	FIBP1916	Finland	Betula pendula	19	16	1997	174
FIBP19	FIBP1916	Finland	Betula pendula	19	16	1998	86
FIBP19	FIBP1916	Finland	Betula pendula	19	16	1999	103
FIBP19	FIBP1916	Finland	Betula pendula	19	16	2000	147
FIBP19	FIBP1916	Finland	Betula pendula	19	16	2001	224
FIBP19	FIBP1916	Finland	Betula pendula	19	16	2002	192
FIBP19	FIBP1916	Finland	Betula pendula	19	16	2003	144
FIBP19	FIBP1916	Finland	Betula pendula	19	16	2004	191
FIBP19	FIBP1916	Finland	Betula pendula	19	16	2005	193
FIBP19	FIBP1916	Finland	Betula pendula	19	16	2006	154
FIBP19	FIBP1916	Finland	Betula pendula	19	16	2007	193
FIBP19	FIBP1916	Finland	Betula pendula	19	16	2008	212
FIBP19	FIBP1916	Finland	Betula pendula	19	16	2009	170
FIBP19	FIBP1916	Finland	Betula pendula	19	16	2010	147
FIBP19	FIBP1916	Finland	Betula pendula	19	16	2011	132
FIBP19	FIBP1916	Finland	Betula pendula	19	16	2012	128
FIBP19	FIBP1916	Finland	Betula pendula	19	16	2013	158
FIBP19	FIBP1916	Finland	Betula pendula	19	16	2014	158
FIBP19	FIBP1916	Finland	Betula pendula	19	16	2015	73
FIBP19	FIBP1917	Finland	Betula pendula	19	17	1961	157
FIBP19	FIBP1917	Finland	Betula pendula	19	17	1962	104
FIBP19	FIBP1917	Finland	Betula pendula	19	17	1963	125
FIBP19	FIBP1917	Finland	Betula pendula	19	17	1964	108
FIBP19	FIBP1917	Finland	Betula pendula	19	17	1965	90
FIBP19	FIBP1917	Finland	Betula pendula	19	17	1966	138
FIBP19	FIBP1917	Finland	Betula pendula	19	17	1967	121
FIBP19	FIBP1917	Finland	Betula pendula	19	17	1968	159
FIBP19	FIBP1917	Finland	Betula pendula	19	17	1969	167
FIBP19	FIBP1917	Finland	Betula pendula	19	17	1970	147
FIBP19	FIBP1917	Finland	Betula pendula	19	17	1971	121
FIBP19	FIBP1917	Finland	Betula pendula	19	17	1972	143
FIBP19	FIBP1917	Finland	Betula pendula	19	17	1973	160
FIBP19	FIBP1917	Finland	Betula pendula	19	17	1974	155
FIBP19	FIBP1917	Finland	Betula pendula	19	17	1975	140
FIBP19	FIBP1917	Finland	Betula pendula	19	17	1976	209
FIBP19	FIBP1917	Finland	Betula pendula	19	17	1977	158
FIBP19	FIBP1917	Finland	Betula pendula	19	17	1978	140
FIBP19	FIBP1917	Finland	Betula pendula	19	17	1979	210
FIBP19	FIBP1917	Finland	Betula pendula	19	17	1980	154
FIBP19	FIBP1917	Finland	Betula pendula	19	17	1981	162
FIBP19	FIBP1917	Finland	Betula pendula	19	17	1982	123
FIBP19	FIBP1917	Finland	Betula pendula	19	17	1983	90
FIBP19	FIBP1917	Finland	Betula pendula	19	17	1984	124
FIBP19	FIBP1917	Finland	Betula pendula	19	17	1985	128
FIBP19	FIBP1917	Finland	Betula pendula	19	17	1986	128
FIBP19	FIBP1917	Finland	Betula pendula	19	17	1987	95
FIBP19	FIBP1917	Finland	Betula pendula	19	17	1988	74
FIBP19	FIBP1917	Finland	Betula pendula	19	17	1989	106
FIBP19	FIBP1917	Finland	Betula pendula	19	17	1990	86
FIBP19	FIBP1917	Finland	Betula pendula	19	17	1991	98
FIBP19	FIBP1917	Finland	Betula pendula	19	17	1992	111
FIBP19	FIBP1917	Finland	Betula pendula	19	17	1993	80
FIBP19	FIBP1917	Finland	Betula pendula	19	17	1994	70
FIBP19	FIBP1917	Finland	Betula pendula	19	17	1995	76
FIBP19	FIBP1917	Finland	Betula pendula	19	17	1996	127
FIBP19	FIBP1917	Finland	Betula pendula	19	17	1997	151
FIBP19	FIBP1917	Finland	Betula pendula	19	17	1998	165
FIBP19	FIBP1917	Finland	Betula pendula	19	17	1999	196
FIBP19	FIBP1917	Finland	Betula pendula	19	17	2000	143
FIBP19	FIBP1917	Finland	Betula pendula	19	17	2001	189
FIBP19	FIBP1917	Finland	Betula pendula	19	17	2002	164
FIBP19	FIBP1917	Finland	Betula pendula	19	17	2003	153
FIBP19	FIBP1917	Finland	Betula pendula	19	17	2004	111
FIBP19	FIBP1917	Finland	Betula pendula	19	17	2005	144
FIBP19	FIBP1917	Finland	Betula pendula	19	17	2006	155
FIBP19	FIBP1917	Finland	Betula pendula	19	17	2007	136
FIBP19	FIBP1917	Finland	Betula pendula	19	17	2008	150
FIBP19	FIBP1917	Finland	Betula pendula	19	17	2009	114
FIBP19	FIBP1917	Finland	Betula pendula	19	17	2010	192
FIBP19	FIBP1917	Finland	Betula pendula	19	17	2011	141
FIBP19	FIBP1917	Finland	Betula pendula	19	17	2012	131
FIBP19	FIBP1917	Finland	Betula pendula	19	17	2013	143
FIBP19	FIBP1917	Finland	Betula pendula	19	17	2014	119
FIBP19	FIBP1917	Finland	Betula pendula	19	17	2015	124
FIBP19	FIBP1918	Finland	Betula pendula	19	18	1972	45
FIBP19	FIBP1918	Finland	Betula pendula	19	18	1973	61
FIBP19	FIBP1918	Finland	Betula pendula	19	18	1974	42
FIBP19	FIBP1918	Finland	Betula pendula	19	18	1975	50
FIBP19	FIBP1918	Finland	Betula pendula	19	18	1976	44
FIBP19	FIBP1918	Finland	Betula pendula	19	18	1977	46
FIBP19	FIBP1918	Finland	Betula pendula	19	18	1978	50
FIBP19	FIBP1918	Finland	Betula pendula	19	18	1979	50
FIBP19	FIBP1918	Finland	Betula pendula	19	18	1980	46
FIBP19	FIBP1918	Finland	Betula pendula	19	18	1981	46
FIBP19	FIBP1918	Finland	Betula pendula	19	18	1982	58
FIBP19	FIBP1918	Finland	Betula pendula	19	18	1983	62
FIBP19	FIBP1918	Finland	Betula pendula	19	18	1984	140
FIBP19	FIBP1918	Finland	Betula pendula	19	18	1985	180
FIBP19	FIBP1918	Finland	Betula pendula	19	18	1986	207
FIBP19	FIBP1918	Finland	Betula pendula	19	18	1987	138
FIBP19	FIBP1918	Finland	Betula pendula	19	18	1988	118
FIBP19	FIBP1918	Finland	Betula pendula	19	18	1989	166
FIBP19	FIBP1918	Finland	Betula pendula	19	18	1990	139
FIBP19	FIBP1918	Finland	Betula pendula	19	18	1991	150
FIBP19	FIBP1918	Finland	Betula pendula	19	18	1992	180
FIBP19	FIBP1918	Finland	Betula pendula	19	18	1993	123
FIBP19	FIBP1918	Finland	Betula pendula	19	18	1994	164
FIBP19	FIBP1918	Finland	Betula pendula	19	18	1995	177
FIBP19	FIBP1918	Finland	Betula pendula	19	18	1996	247
FIBP19	FIBP1918	Finland	Betula pendula	19	18	1997	290
FIBP19	FIBP1918	Finland	Betula pendula	19	18	1998	287
FIBP19	FIBP1918	Finland	Betula pendula	19	18	1999	307
FIBP19	FIBP1918	Finland	Betula pendula	19	18	2000	291
FIBP19	FIBP1918	Finland	Betula pendula	19	18	2001	366
FIBP19	FIBP1918	Finland	Betula pendula	19	18	2002	432
FIBP19	FIBP1918	Finland	Betula pendula	19	18	2003	313
FIBP19	FIBP1918	Finland	Betula pendula	19	18	2004	257
FIBP19	FIBP1918	Finland	Betula pendula	19	18	2005	348
FIBP19	FIBP1918	Finland	Betula pendula	19	18	2006	393
FIBP19	FIBP1918	Finland	Betula pendula	19	18	2007	342
FIBP19	FIBP1918	Finland	Betula pendula	19	18	2008	394
FIBP19	FIBP1918	Finland	Betula pendula	19	18	2009	376
FIBP19	FIBP1918	Finland	Betula pendula	19	18	2010	349
FIBP19	FIBP1918	Finland	Betula pendula	19	18	2011	342
FIBP19	FIBP1918	Finland	Betula pendula	19	18	2012	259
FIBP19	FIBP1918	Finland	Betula pendula	19	18	2013	305
FIBP19	FIBP1918	Finland	Betula pendula	19	18	2014	339
FIBP19	FIBP1918	Finland	Betula pendula	19	18	2015	275
FIBP19	FIBP1919	Finland	Betula pendula	19	19	1960	185
FIBP19	FIBP1919	Finland	Betula pendula	19	19	1961	214
FIBP19	FIBP1919	Finland	Betula pendula	19	19	1962	212
FIBP19	FIBP1919	Finland	Betula pendula	19	19	1963	267
FIBP19	FIBP1919	Finland	Betula pendula	19	19	1964	287
FIBP19	FIBP1919	Finland	Betula pendula	19	19	1965	278
FIBP19	FIBP1919	Finland	Betula pendula	19	19	1966	375
FIBP19	FIBP1919	Finland	Betula pendula	19	19	1967	320
FIBP19	FIBP1919	Finland	Betula pendula	19	19	1968	326
FIBP19	FIBP1919	Finland	Betula pendula	19	19	1969	339
FIBP19	FIBP1919	Finland	Betula pendula	19	19	1970	517
FIBP19	FIBP1919	Finland	Betula pendula	19	19	1971	463
FIBP19	FIBP1919	Finland	Betula pendula	19	19	1972	568
FIBP19	FIBP1919	Finland	Betula pendula	19	19	1973	559
FIBP19	FIBP1919	Finland	Betula pendula	19	19	1974	559
FIBP19	FIBP1919	Finland	Betula pendula	19	19	1975	308
FIBP19	FIBP1919	Finland	Betula pendula	19	19	1976	454
FIBP19	FIBP1919	Finland	Betula pendula	19	19	1977	389
FIBP19	FIBP1919	Finland	Betula pendula	19	19	1978	395
FIBP19	FIBP1919	Finland	Betula pendula	19	19	1979	456
FIBP19	FIBP1919	Finland	Betula pendula	19	19	1980	399
FIBP19	FIBP1919	Finland	Betula pendula	19	19	1981	412
FIBP19	FIBP1919	Finland	Betula pendula	19	19	1982	290
FIBP19	FIBP1919	Finland	Betula pendula	19	19	1983	236
FIBP19	FIBP1919	Finland	Betula pendula	19	19	1984	381
FIBP19	FIBP1919	Finland	Betula pendula	19	19	1985	368
FIBP19	FIBP1919	Finland	Betula pendula	19	19	1986	319
FIBP19	FIBP1919	Finland	Betula pendula	19	19	1987	268
FIBP19	FIBP1919	Finland	Betula pendula	19	19	1988	226
FIBP19	FIBP1919	Finland	Betula pendula	19	19	1989	147
FIBP19	FIBP1919	Finland	Betula pendula	19	19	1990	247
FIBP19	FIBP1919	Finland	Betula pendula	19	19	1991	216
FIBP19	FIBP1919	Finland	Betula pendula	19	19	1992	266
FIBP19	FIBP1919	Finland	Betula pendula	19	19	1993	185
FIBP19	FIBP1919	Finland	Betula pendula	19	19	1994	198
FIBP19	FIBP1919	Finland	Betula pendula	19	19	1995	165
FIBP19	FIBP1919	Finland	Betula pendula	19	19	1996	218
FIBP19	FIBP1919	Finland	Betula pendula	19	19	1997	253
FIBP19	FIBP1919	Finland	Betula pendula	19	19	1998	180
FIBP19	FIBP1919	Finland	Betula pendula	19	19	1999	247
FIBP19	FIBP1919	Finland	Betula pendula	19	19	2000	204
FIBP19	FIBP1919	Finland	Betula pendula	19	19	2001	243
FIBP19	FIBP1919	Finland	Betula pendula	19	19	2002	261
FIBP19	FIBP1919	Finland	Betula pendula	19	19	2003	288
FIBP19	FIBP1919	Finland	Betula pendula	19	19	2004	278
FIBP19	FIBP1919	Finland	Betula pendula	19	19	2005	254
FIBP19	FIBP1919	Finland	Betula pendula	19	19	2006	213
FIBP19	FIBP1919	Finland	Betula pendula	19	19	2007	228
FIBP19	FIBP1919	Finland	Betula pendula	19	19	2008	213
FIBP19	FIBP1919	Finland	Betula pendula	19	19	2009	217
FIBP19	FIBP1919	Finland	Betula pendula	19	19	2010	259
FIBP19	FIBP1919	Finland	Betula pendula	19	19	2011	219
FIBP19	FIBP1919	Finland	Betula pendula	19	19	2012	160
FIBP19	FIBP1919	Finland	Betula pendula	19	19	2013	218
FIBP19	FIBP1919	Finland	Betula pendula	19	19	2014	166
FIBP19	FIBP1919	Finland	Betula pendula	19	19	2015	179
FIBP19	FIBP1920	Finland	Betula pendula	19	20	1972	217
FIBP19	FIBP1920	Finland	Betula pendula	19	20	1973	184
FIBP19	FIBP1920	Finland	Betula pendula	19	20	1974	145
FIBP19	FIBP1920	Finland	Betula pendula	19	20	1975	157
FIBP19	FIBP1920	Finland	Betula pendula	19	20	1976	170
FIBP19	FIBP1920	Finland	Betula pendula	19	20	1977	110
FIBP19	FIBP1920	Finland	Betula pendula	19	20	1978	133
FIBP19	FIBP1920	Finland	Betula pendula	19	20	1979	163
FIBP19	FIBP1920	Finland	Betula pendula	19	20	1980	135
FIBP19	FIBP1920	Finland	Betula pendula	19	20	1981	106
FIBP19	FIBP1920	Finland	Betula pendula	19	20	1982	157
FIBP19	FIBP1920	Finland	Betula pendula	19	20	1983	119
FIBP19	FIBP1920	Finland	Betula pendula	19	20	1984	170
FIBP19	FIBP1920	Finland	Betula pendula	19	20	1985	163
FIBP19	FIBP1920	Finland	Betula pendula	19	20	1986	150
FIBP19	FIBP1920	Finland	Betula pendula	19	20	1987	124
FIBP19	FIBP1920	Finland	Betula pendula	19	20	1988	111
FIBP19	FIBP1920	Finland	Betula pendula	19	20	1989	99
FIBP19	FIBP1920	Finland	Betula pendula	19	20	1990	98
FIBP19	FIBP1920	Finland	Betula pendula	19	20	1991	78
FIBP19	FIBP1920	Finland	Betula pendula	19	20	1992	66
FIBP19	FIBP1920	Finland	Betula pendula	19	20	1993	101
FIBP19	FIBP1920	Finland	Betula pendula	19	20	1994	95
FIBP19	FIBP1920	Finland	Betula pendula	19	20	1995	81
FIBP19	FIBP1920	Finland	Betula pendula	19	20	1996	84
FIBP19	FIBP1920	Finland	Betula pendula	19	20	1997	124
FIBP19	FIBP1920	Finland	Betula pendula	19	20	1998	114
FIBP19	FIBP1920	Finland	Betula pendula	19	20	1999	129
FIBP19	FIBP1920	Finland	Betula pendula	19	20	2000	113
FIBP19	FIBP1920	Finland	Betula pendula	19	20	2001	131
FIBP19	FIBP1920	Finland	Betula pendula	19	20	2002	161
FIBP19	FIBP1920	Finland	Betula pendula	19	20	2003	196
FIBP19	FIBP1920	Finland	Betula pendula	19	20	2004	92
FIBP19	FIBP1920	Finland	Betula pendula	19	20	2005	138
FIBP19	FIBP1920	Finland	Betula pendula	19	20	2006	136
FIBP19	FIBP1920	Finland	Betula pendula	19	20	2007	150
FIBP19	FIBP1920	Finland	Betula pendula	19	20	2008	133
FIBP19	FIBP1920	Finland	Betula pendula	19	20	2009	123
FIBP19	FIBP1920	Finland	Betula pendula	19	20	2010	137
FIBP19	FIBP1920	Finland	Betula pendula	19	20	2011	96
FIBP19	FIBP1920	Finland	Betula pendula	19	20	2012	115
FIBP19	FIBP1920	Finland	Betula pendula	19	20	2013	121
FIBP19	FIBP1920	Finland	Betula pendula	19	20	2014	89
FIBP19	FIBP1920	Finland	Betula pendula	19	20	2015	112
FIBP19	FIBP1921	Finland	Betula pendula	19	21	1962	168
FIBP19	FIBP1921	Finland	Betula pendula	19	21	1963	73
FIBP19	FIBP1921	Finland	Betula pendula	19	21	1964	181
FIBP19	FIBP1921	Finland	Betula pendula	19	21	1965	226
FIBP19	FIBP1921	Finland	Betula pendula	19	21	1966	199
FIBP19	FIBP1921	Finland	Betula pendula	19	21	1967	185
FIBP19	FIBP1921	Finland	Betula pendula	19	21	1968	218
FIBP19	FIBP1921	Finland	Betula pendula	19	21	1969	258
FIBP19	FIBP1921	Finland	Betula pendula	19	21	1970	243
FIBP19	FIBP1921	Finland	Betula pendula	19	21	1971	176
FIBP19	FIBP1921	Finland	Betula pendula	19	21	1972	183
FIBP19	FIBP1921	Finland	Betula pendula	19	21	1973	246
FIBP19	FIBP1921	Finland	Betula pendula	19	21	1974	201
FIBP19	FIBP1921	Finland	Betula pendula	19	21	1975	176
FIBP19	FIBP1921	Finland	Betula pendula	19	21	1976	248
FIBP19	FIBP1921	Finland	Betula pendula	19	21	1977	238
FIBP19	FIBP1921	Finland	Betula pendula	19	21	1978	196
FIBP19	FIBP1921	Finland	Betula pendula	19	21	1979	233
FIBP19	FIBP1921	Finland	Betula pendula	19	21	1980	175
FIBP19	FIBP1921	Finland	Betula pendula	19	21	1981	200
FIBP19	FIBP1921	Finland	Betula pendula	19	21	1982	140
FIBP19	FIBP1921	Finland	Betula pendula	19	21	1983	124
FIBP19	FIBP1921	Finland	Betula pendula	19	21	1984	212
FIBP19	FIBP1921	Finland	Betula pendula	19	21	1985	212
FIBP19	FIBP1921	Finland	Betula pendula	19	21	1986	240
FIBP19	FIBP1921	Finland	Betula pendula	19	21	1987	169
FIBP19	FIBP1921	Finland	Betula pendula	19	21	1988	164
FIBP19	FIBP1921	Finland	Betula pendula	19	21	1989	121
FIBP19	FIBP1921	Finland	Betula pendula	19	21	1990	172
FIBP19	FIBP1921	Finland	Betula pendula	19	21	1991	137
FIBP19	FIBP1921	Finland	Betula pendula	19	21	1992	195
FIBP19	FIBP1921	Finland	Betula pendula	19	21	1993	95
FIBP19	FIBP1921	Finland	Betula pendula	19	21	1994	149
FIBP19	FIBP1921	Finland	Betula pendula	19	21	1995	106
FIBP19	FIBP1921	Finland	Betula pendula	19	21	1996	97
FIBP19	FIBP1921	Finland	Betula pendula	19	21	1997	175
FIBP19	FIBP1921	Finland	Betula pendula	19	21	1998	128
FIBP19	FIBP1921	Finland	Betula pendula	19	21	1999	145
FIBP19	FIBP1921	Finland	Betula pendula	19	21	2000	104
FIBP19	FIBP1921	Finland	Betula pendula	19	21	2001	150
FIBP19	FIBP1921	Finland	Betula pendula	19	21	2002	121
FIBP19	FIBP1921	Finland	Betula pendula	19	21	2003	131
FIBP19	FIBP1921	Finland	Betula pendula	19	21	2004	103
FIBP19	FIBP1921	Finland	Betula pendula	19	21	2005	174
FIBP19	FIBP1921	Finland	Betula pendula	19	21	2006	179
FIBP19	FIBP1921	Finland	Betula pendula	19	21	2007	148
FIBP19	FIBP1921	Finland	Betula pendula	19	21	2008	131
FIBP19	FIBP1921	Finland	Betula pendula	19	21	2009	181
FIBP19	FIBP1921	Finland	Betula pendula	19	21	2010	142
FIBP19	FIBP1921	Finland	Betula pendula	19	21	2011	170
FIBP19	FIBP1921	Finland	Betula pendula	19	21	2012	109
FIBP19	FIBP1921	Finland	Betula pendula	19	21	2013	172
FIBP19	FIBP1921	Finland	Betula pendula	19	21	2014	148
FIBP19	FIBP1921	Finland	Betula pendula	19	21	2015	108
FIBP19	FIBP1922	Finland	Betula pendula	19	22	1968	444
FIBP19	FIBP1922	Finland	Betula pendula	19	22	1969	347
FIBP19	FIBP1922	Finland	Betula pendula	19	22	1970	317
FIBP19	FIBP1922	Finland	Betula pendula	19	22	1971	204
FIBP19	FIBP1922	Finland	Betula pendula	19	22	1972	239
FIBP19	FIBP1922	Finland	Betula pendula	19	22	1973	303
FIBP19	FIBP1922	Finland	Betula pendula	19	22	1974	276
FIBP19	FIBP1922	Finland	Betula pendula	19	22	1975	156
FIBP19	FIBP1922	Finland	Betula pendula	19	22	1976	286
FIBP19	FIBP1922	Finland	Betula pendula	19	22	1977	253
FIBP19	FIBP1922	Finland	Betula pendula	19	22	1978	209
FIBP19	FIBP1922	Finland	Betula pendula	19	22	1979	295
FIBP19	FIBP1922	Finland	Betula pendula	19	22	1980	245
FIBP19	FIBP1922	Finland	Betula pendula	19	22	1981	245
FIBP19	FIBP1922	Finland	Betula pendula	19	22	1982	221
FIBP19	FIBP1922	Finland	Betula pendula	19	22	1983	187
FIBP19	FIBP1922	Finland	Betula pendula	19	22	1984	225
FIBP19	FIBP1922	Finland	Betula pendula	19	22	1985	268
FIBP19	FIBP1922	Finland	Betula pendula	19	22	1986	228
FIBP19	FIBP1922	Finland	Betula pendula	19	22	1987	152
FIBP19	FIBP1922	Finland	Betula pendula	19	22	1988	179
FIBP19	FIBP1922	Finland	Betula pendula	19	22	1989	130
FIBP19	FIBP1922	Finland	Betula pendula	19	22	1990	163
FIBP19	FIBP1922	Finland	Betula pendula	19	22	1991	143
FIBP19	FIBP1922	Finland	Betula pendula	19	22	1992	190
FIBP19	FIBP1922	Finland	Betula pendula	19	22	1993	220
FIBP19	FIBP1922	Finland	Betula pendula	19	22	1994	173
FIBP19	FIBP1922	Finland	Betula pendula	19	22	1995	165
FIBP19	FIBP1922	Finland	Betula pendula	19	22	1996	185
FIBP19	FIBP1922	Finland	Betula pendula	19	22	1997	231
FIBP19	FIBP1922	Finland	Betula pendula	19	22	1998	162
FIBP19	FIBP1922	Finland	Betula pendula	19	22	1999	153
FIBP19	FIBP1922	Finland	Betula pendula	19	22	2000	153
FIBP19	FIBP1922	Finland	Betula pendula	19	22	2001	178
FIBP19	FIBP1922	Finland	Betula pendula	19	22	2002	211
FIBP19	FIBP1922	Finland	Betula pendula	19	22	2003	196
FIBP19	FIBP1922	Finland	Betula pendula	19	22	2004	167
FIBP19	FIBP1922	Finland	Betula pendula	19	22	2005	172
FIBP19	FIBP1922	Finland	Betula pendula	19	22	2006	171
FIBP19	FIBP1922	Finland	Betula pendula	19	22	2007	221
FIBP19	FIBP1922	Finland	Betula pendula	19	22	2008	186
FIBP19	FIBP1922	Finland	Betula pendula	19	22	2009	166
FIBP19	FIBP1922	Finland	Betula pendula	19	22	2010	188
FIBP19	FIBP1922	Finland	Betula pendula	19	22	2011	144
FIBP19	FIBP1922	Finland	Betula pendula	19	22	2012	118
FIBP19	FIBP1922	Finland	Betula pendula	19	22	2013	145
FIBP19	FIBP1922	Finland	Betula pendula	19	22	2014	119
FIBP19	FIBP1922	Finland	Betula pendula	19	22	2015	95
FIBP19	FIBP1923	Finland	Betula pendula	19	23	1979	792
FIBP19	FIBP1923	Finland	Betula pendula	19	23	1980	613
FIBP19	FIBP1923	Finland	Betula pendula	19	23	1981	498
FIBP19	FIBP1923	Finland	Betula pendula	19	23	1982	497
FIBP19	FIBP1923	Finland	Betula pendula	19	23	1983	534
FIBP19	FIBP1923	Finland	Betula pendula	19	23	1984	462
FIBP19	FIBP1923	Finland	Betula pendula	19	23	1985	450
FIBP19	FIBP1923	Finland	Betula pendula	19	23	1986	457
FIBP19	FIBP1923	Finland	Betula pendula	19	23	1987	346
FIBP19	FIBP1923	Finland	Betula pendula	19	23	1988	323
FIBP19	FIBP1923	Finland	Betula pendula	19	23	1989	318
FIBP19	FIBP1923	Finland	Betula pendula	19	23	1990	365
FIBP19	FIBP1923	Finland	Betula pendula	19	23	1991	378
FIBP19	FIBP1923	Finland	Betula pendula	19	23	1992	390
FIBP19	FIBP1923	Finland	Betula pendula	19	23	1993	362
FIBP19	FIBP1923	Finland	Betula pendula	19	23	1994	346
FIBP19	FIBP1923	Finland	Betula pendula	19	23	1995	250
FIBP19	FIBP1923	Finland	Betula pendula	19	23	1996	350
FIBP19	FIBP1923	Finland	Betula pendula	19	23	1997	356
FIBP19	FIBP1923	Finland	Betula pendula	19	23	1998	227
FIBP19	FIBP1923	Finland	Betula pendula	19	23	1999	281
FIBP19	FIBP1923	Finland	Betula pendula	19	23	2000	137
FIBP19	FIBP1923	Finland	Betula pendula	19	23	2001	289
FIBP19	FIBP1923	Finland	Betula pendula	19	23	2002	266
FIBP19	FIBP1923	Finland	Betula pendula	19	23	2003	274
FIBP19	FIBP1923	Finland	Betula pendula	19	23	2004	160
FIBP19	FIBP1923	Finland	Betula pendula	19	23	2005	203
FIBP19	FIBP1923	Finland	Betula pendula	19	23	2006	204
FIBP19	FIBP1923	Finland	Betula pendula	19	23	2007	273
FIBP19	FIBP1923	Finland	Betula pendula	19	23	2008	238
FIBP19	FIBP1923	Finland	Betula pendula	19	23	2009	227
FIBP19	FIBP1923	Finland	Betula pendula	19	23	2010	309
FIBP19	FIBP1923	Finland	Betula pendula	19	23	2011	233
FIBP19	FIBP1923	Finland	Betula pendula	19	23	2012	141
FIBP19	FIBP1923	Finland	Betula pendula	19	23	2013	240
FIBP19	FIBP1923	Finland	Betula pendula	19	23	2014	171
FIBP19	FIBP1923	Finland	Betula pendula	19	23	2015	134
FIBP19	FIBP1924	Finland	Betula pendula	19	24	1981	196
FIBP19	FIBP1924	Finland	Betula pendula	19	24	1982	216
FIBP19	FIBP1924	Finland	Betula pendula	19	24	1983	171
FIBP19	FIBP1924	Finland	Betula pendula	19	24	1984	191
FIBP19	FIBP1924	Finland	Betula pendula	19	24	1985	165
FIBP19	FIBP1924	Finland	Betula pendula	19	24	1986	184
FIBP19	FIBP1924	Finland	Betula pendula	19	24	1987	155
FIBP19	FIBP1924	Finland	Betula pendula	19	24	1988	177
FIBP19	FIBP1924	Finland	Betula pendula	19	24	1989	202
FIBP19	FIBP1924	Finland	Betula pendula	19	24	1990	237
FIBP19	FIBP1924	Finland	Betula pendula	19	24	1991	232
FIBP19	FIBP1924	Finland	Betula pendula	19	24	1992	209
FIBP19	FIBP1924	Finland	Betula pendula	19	24	1993	284
FIBP19	FIBP1924	Finland	Betula pendula	19	24	1994	190
FIBP19	FIBP1924	Finland	Betula pendula	19	24	1995	180
FIBP19	FIBP1924	Finland	Betula pendula	19	24	1996	190
FIBP19	FIBP1924	Finland	Betula pendula	19	24	1997	264
FIBP19	FIBP1924	Finland	Betula pendula	19	24	1998	232
FIBP19	FIBP1924	Finland	Betula pendula	19	24	1999	228
FIBP19	FIBP1924	Finland	Betula pendula	19	24	2000	291
FIBP19	FIBP1924	Finland	Betula pendula	19	24	2001	283
FIBP19	FIBP1924	Finland	Betula pendula	19	24	2002	287
FIBP19	FIBP1924	Finland	Betula pendula	19	24	2003	279
FIBP19	FIBP1924	Finland	Betula pendula	19	24	2004	284
FIBP19	FIBP1924	Finland	Betula pendula	19	24	2005	277
FIBP19	FIBP1924	Finland	Betula pendula	19	24	2006	236
FIBP19	FIBP1924	Finland	Betula pendula	19	24	2007	282
FIBP19	FIBP1924	Finland	Betula pendula	19	24	2008	252
FIBP19	FIBP1924	Finland	Betula pendula	19	24	2009	259
FIBP19	FIBP1924	Finland	Betula pendula	19	24	2010	252
FIBP19	FIBP1924	Finland	Betula pendula	19	24	2011	204
FIBP19	FIBP1924	Finland	Betula pendula	19	24	2012	187
FIBP19	FIBP1924	Finland	Betula pendula	19	24	2013	249
FIBP19	FIBP1924	Finland	Betula pendula	19	24	2014	180
FIBP19	FIBP1924	Finland	Betula pendula	19	24	2015	139
FIBP19	FIBP1925	Finland	Betula pendula	19	25	1977	52
FIBP19	FIBP1925	Finland	Betula pendula	19	25	1978	63
FIBP19	FIBP1925	Finland	Betula pendula	19	25	1979	117
FIBP19	FIBP1925	Finland	Betula pendula	19	25	1980	126
FIBP19	FIBP1925	Finland	Betula pendula	19	25	1981	155
FIBP19	FIBP1925	Finland	Betula pendula	19	25	1982	154
FIBP19	FIBP1925	Finland	Betula pendula	19	25	1983	114
FIBP19	FIBP1925	Finland	Betula pendula	19	25	1984	150
FIBP19	FIBP1925	Finland	Betula pendula	19	25	1985	124
FIBP19	FIBP1925	Finland	Betula pendula	19	25	1986	83
FIBP19	FIBP1925	Finland	Betula pendula	19	25	1987	61
FIBP19	FIBP1925	Finland	Betula pendula	19	25	1988	50
FIBP19	FIBP1925	Finland	Betula pendula	19	25	1989	50
FIBP19	FIBP1925	Finland	Betula pendula	19	25	1990	141
FIBP19	FIBP1925	Finland	Betula pendula	19	25	1991	159
FIBP19	FIBP1925	Finland	Betula pendula	19	25	1992	214
FIBP19	FIBP1925	Finland	Betula pendula	19	25	1993	285
FIBP19	FIBP1925	Finland	Betula pendula	19	25	1994	239
FIBP19	FIBP1925	Finland	Betula pendula	19	25	1995	159
FIBP19	FIBP1925	Finland	Betula pendula	19	25	1996	214
FIBP19	FIBP1925	Finland	Betula pendula	19	25	1997	170
FIBP19	FIBP1925	Finland	Betula pendula	19	25	1998	229
FIBP19	FIBP1925	Finland	Betula pendula	19	25	1999	299
FIBP19	FIBP1925	Finland	Betula pendula	19	25	2000	278
FIBP19	FIBP1925	Finland	Betula pendula	19	25	2001	376
FIBP19	FIBP1925	Finland	Betula pendula	19	25	2002	430
FIBP19	FIBP1925	Finland	Betula pendula	19	25	2003	401
FIBP19	FIBP1925	Finland	Betula pendula	19	25	2004	340
FIBP19	FIBP1925	Finland	Betula pendula	19	25	2005	339
FIBP19	FIBP1925	Finland	Betula pendula	19	25	2006	377
FIBP19	FIBP1925	Finland	Betula pendula	19	25	2007	423
FIBP19	FIBP1925	Finland	Betula pendula	19	25	2008	353
FIBP19	FIBP1925	Finland	Betula pendula	19	25	2009	449
FIBP19	FIBP1925	Finland	Betula pendula	19	25	2010	471
FIBP19	FIBP1925	Finland	Betula pendula	19	25	2011	350
FIBP19	FIBP1925	Finland	Betula pendula	19	25	2012	258
FIBP19	FIBP1925	Finland	Betula pendula	19	25	2013	325
FIBP19	FIBP1925	Finland	Betula pendula	19	25	2014	353
FIBP19	FIBP1925	Finland	Betula pendula	19	25	2015	289
FIBP20	FIBP2001	Finland	Betula pendula	20	1	1969	76
FIBP20	FIBP2001	Finland	Betula pendula	20	1	1970	42
FIBP20	FIBP2001	Finland	Betula pendula	20	1	1971	113
FIBP20	FIBP2001	Finland	Betula pendula	20	1	1972	76
FIBP20	FIBP2001	Finland	Betula pendula	20	1	1973	110
FIBP20	FIBP2001	Finland	Betula pendula	20	1	1974	123
FIBP20	FIBP2001	Finland	Betula pendula	20	1	1975	188
FIBP20	FIBP2001	Finland	Betula pendula	20	1	1976	195
FIBP20	FIBP2001	Finland	Betula pendula	20	1	1977	137
FIBP20	FIBP2001	Finland	Betula pendula	20	1	1978	105
FIBP20	FIBP2001	Finland	Betula pendula	20	1	1979	98
FIBP20	FIBP2001	Finland	Betula pendula	20	1	1980	137
FIBP20	FIBP2001	Finland	Betula pendula	20	1	1981	229
FIBP20	FIBP2001	Finland	Betula pendula	20	1	1982	236
FIBP20	FIBP2001	Finland	Betula pendula	20	1	1983	239
FIBP20	FIBP2001	Finland	Betula pendula	20	1	1984	169
FIBP20	FIBP2001	Finland	Betula pendula	20	1	1985	164
FIBP20	FIBP2001	Finland	Betula pendula	20	1	1986	185
FIBP20	FIBP2001	Finland	Betula pendula	20	1	1987	104
FIBP20	FIBP2001	Finland	Betula pendula	20	1	1988	149
FIBP20	FIBP2001	Finland	Betula pendula	20	1	1989	134
FIBP20	FIBP2001	Finland	Betula pendula	20	1	1990	141
FIBP20	FIBP2001	Finland	Betula pendula	20	1	1991	69
FIBP20	FIBP2001	Finland	Betula pendula	20	1	1992	133
FIBP20	FIBP2001	Finland	Betula pendula	20	1	1993	82
FIBP20	FIBP2001	Finland	Betula pendula	20	1	1994	64
FIBP20	FIBP2001	Finland	Betula pendula	20	1	1995	44
FIBP20	FIBP2001	Finland	Betula pendula	20	1	1996	52
FIBP20	FIBP2001	Finland	Betula pendula	20	1	1997	188
FIBP20	FIBP2001	Finland	Betula pendula	20	1	1998	215
FIBP20	FIBP2001	Finland	Betula pendula	20	1	1999	161
FIBP20	FIBP2001	Finland	Betula pendula	20	1	2000	232
FIBP20	FIBP2001	Finland	Betula pendula	20	1	2001	198
FIBP20	FIBP2001	Finland	Betula pendula	20	1	2002	163
FIBP20	FIBP2001	Finland	Betula pendula	20	1	2003	132
FIBP20	FIBP2001	Finland	Betula pendula	20	1	2004	153
FIBP20	FIBP2001	Finland	Betula pendula	20	1	2005	172
FIBP20	FIBP2001	Finland	Betula pendula	20	1	2006	134
FIBP20	FIBP2001	Finland	Betula pendula	20	1	2007	72
FIBP20	FIBP2001	Finland	Betula pendula	20	1	2008	108
FIBP20	FIBP2001	Finland	Betula pendula	20	1	2009	117
FIBP20	FIBP2001	Finland	Betula pendula	20	1	2010	150
FIBP20	FIBP2001	Finland	Betula pendula	20	1	2011	136
FIBP20	FIBP2001	Finland	Betula pendula	20	1	2012	167
FIBP20	FIBP2001	Finland	Betula pendula	20	1	2013	162
FIBP20	FIBP2001	Finland	Betula pendula	20	1	2014	153
FIBP20	FIBP2001	Finland	Betula pendula	20	1	2015	140
FIBP20	FIBP2002	Finland	Betula pendula	20	2	1975	485
FIBP20	FIBP2002	Finland	Betula pendula	20	2	1976	355
FIBP20	FIBP2002	Finland	Betula pendula	20	2	1977	315
FIBP20	FIBP2002	Finland	Betula pendula	20	2	1978	291
FIBP20	FIBP2002	Finland	Betula pendula	20	2	1979	159
FIBP20	FIBP2002	Finland	Betula pendula	20	2	1980	128
FIBP20	FIBP2002	Finland	Betula pendula	20	2	1981	77
FIBP20	FIBP2002	Finland	Betula pendula	20	2	1982	142
FIBP20	FIBP2002	Finland	Betula pendula	20	2	1983	139
FIBP20	FIBP2002	Finland	Betula pendula	20	2	1984	62
FIBP20	FIBP2002	Finland	Betula pendula	20	2	1985	57
FIBP20	FIBP2002	Finland	Betula pendula	20	2	1986	88
FIBP20	FIBP2002	Finland	Betula pendula	20	2	1987	79
FIBP20	FIBP2002	Finland	Betula pendula	20	2	1988	95
FIBP20	FIBP2002	Finland	Betula pendula	20	2	1989	109
FIBP20	FIBP2002	Finland	Betula pendula	20	2	1990	114
FIBP20	FIBP2002	Finland	Betula pendula	20	2	1991	135
FIBP20	FIBP2002	Finland	Betula pendula	20	2	1992	24
FIBP20	FIBP2002	Finland	Betula pendula	20	2	1993	29
FIBP20	FIBP2002	Finland	Betula pendula	20	2	1994	7
FIBP20	FIBP2002	Finland	Betula pendula	20	2	1995	20
FIBP20	FIBP2002	Finland	Betula pendula	20	2	1996	27
FIBP20	FIBP2002	Finland	Betula pendula	20	2	1997	15
FIBP20	FIBP2002	Finland	Betula pendula	20	2	1998	28
FIBP20	FIBP2002	Finland	Betula pendula	20	2	1999	81
FIBP20	FIBP2002	Finland	Betula pendula	20	2	2000	129
FIBP20	FIBP2002	Finland	Betula pendula	20	2	2001	76
FIBP20	FIBP2002	Finland	Betula pendula	20	2	2002	43
FIBP20	FIBP2002	Finland	Betula pendula	20	2	2003	74
FIBP20	FIBP2002	Finland	Betula pendula	20	2	2004	80
FIBP20	FIBP2002	Finland	Betula pendula	20	2	2005	102
FIBP20	FIBP2002	Finland	Betula pendula	20	2	2006	69
FIBP20	FIBP2002	Finland	Betula pendula	20	2	2007	47
FIBP20	FIBP2002	Finland	Betula pendula	20	2	2008	84
FIBP20	FIBP2002	Finland	Betula pendula	20	2	2009	86
FIBP20	FIBP2002	Finland	Betula pendula	20	2	2010	106
FIBP20	FIBP2002	Finland	Betula pendula	20	2	2011	87
FIBP20	FIBP2002	Finland	Betula pendula	20	2	2012	135
FIBP20	FIBP2002	Finland	Betula pendula	20	2	2013	111
FIBP20	FIBP2002	Finland	Betula pendula	20	2	2014	99
FIBP20	FIBP2002	Finland	Betula pendula	20	2	2015	119
FIBP20	FIBP2003	Finland	Betula pendula	20	3	1972	219
FIBP20	FIBP2003	Finland	Betula pendula	20	3	1973	216
FIBP20	FIBP2003	Finland	Betula pendula	20	3	1974	378
FIBP20	FIBP2003	Finland	Betula pendula	20	3	1975	480
FIBP20	FIBP2003	Finland	Betula pendula	20	3	1976	440
FIBP20	FIBP2003	Finland	Betula pendula	20	3	1977	331
FIBP20	FIBP2003	Finland	Betula pendula	20	3	1978	265
FIBP20	FIBP2003	Finland	Betula pendula	20	3	1979	236
FIBP20	FIBP2003	Finland	Betula pendula	20	3	1980	290
FIBP20	FIBP2003	Finland	Betula pendula	20	3	1981	288
FIBP20	FIBP2003	Finland	Betula pendula	20	3	1982	253
FIBP20	FIBP2003	Finland	Betula pendula	20	3	1983	225
FIBP20	FIBP2003	Finland	Betula pendula	20	3	1984	194
FIBP20	FIBP2003	Finland	Betula pendula	20	3	1985	202
FIBP20	FIBP2003	Finland	Betula pendula	20	3	1986	246
FIBP20	FIBP2003	Finland	Betula pendula	20	3	1987	154
FIBP20	FIBP2003	Finland	Betula pendula	20	3	1988	205
FIBP20	FIBP2003	Finland	Betula pendula	20	3	1989	270
FIBP20	FIBP2003	Finland	Betula pendula	20	3	1990	180
FIBP20	FIBP2003	Finland	Betula pendula	20	3	1991	148
FIBP20	FIBP2003	Finland	Betula pendula	20	3	1992	177
FIBP20	FIBP2003	Finland	Betula pendula	20	3	1993	104
FIBP20	FIBP2003	Finland	Betula pendula	20	3	1994	128
FIBP20	FIBP2003	Finland	Betula pendula	20	3	1995	114
FIBP20	FIBP2003	Finland	Betula pendula	20	3	1996	106
FIBP20	FIBP2003	Finland	Betula pendula	20	3	1997	192
FIBP20	FIBP2003	Finland	Betula pendula	20	3	1998	134
FIBP20	FIBP2003	Finland	Betula pendula	20	3	1999	95
FIBP20	FIBP2003	Finland	Betula pendula	20	3	2000	124
FIBP20	FIBP2003	Finland	Betula pendula	20	3	2001	192
FIBP20	FIBP2003	Finland	Betula pendula	20	3	2002	161
FIBP20	FIBP2003	Finland	Betula pendula	20	3	2003	123
FIBP20	FIBP2003	Finland	Betula pendula	20	3	2004	104
FIBP20	FIBP2003	Finland	Betula pendula	20	3	2005	191
FIBP20	FIBP2003	Finland	Betula pendula	20	3	2006	166
FIBP20	FIBP2003	Finland	Betula pendula	20	3	2007	83
FIBP20	FIBP2003	Finland	Betula pendula	20	3	2008	139
FIBP20	FIBP2003	Finland	Betula pendula	20	3	2009	129
FIBP20	FIBP2003	Finland	Betula pendula	20	3	2010	109
FIBP20	FIBP2003	Finland	Betula pendula	20	3	2011	116
FIBP20	FIBP2003	Finland	Betula pendula	20	3	2012	116
FIBP20	FIBP2003	Finland	Betula pendula	20	3	2013	99
FIBP20	FIBP2003	Finland	Betula pendula	20	3	2014	89
FIBP20	FIBP2003	Finland	Betula pendula	20	3	2015	90
FIBP20	FIBP2004	Finland	Betula pendula	20	4	1984	233
FIBP20	FIBP2004	Finland	Betula pendula	20	4	1985	121
FIBP20	FIBP2004	Finland	Betula pendula	20	4	1986	105
FIBP20	FIBP2004	Finland	Betula pendula	20	4	1987	61
FIBP20	FIBP2004	Finland	Betula pendula	20	4	1988	52
FIBP20	FIBP2004	Finland	Betula pendula	20	4	1989	60
FIBP20	FIBP2004	Finland	Betula pendula	20	4	1990	85
FIBP20	FIBP2004	Finland	Betula pendula	20	4	1991	52
FIBP20	FIBP2004	Finland	Betula pendula	20	4	1992	221
FIBP20	FIBP2004	Finland	Betula pendula	20	4	1993	53
FIBP20	FIBP2004	Finland	Betula pendula	20	4	1994	96
FIBP20	FIBP2004	Finland	Betula pendula	20	4	1995	71
FIBP20	FIBP2004	Finland	Betula pendula	20	4	1996	78
FIBP20	FIBP2004	Finland	Betula pendula	20	4	1997	71
FIBP20	FIBP2004	Finland	Betula pendula	20	4	1998	39
FIBP20	FIBP2004	Finland	Betula pendula	20	4	1999	11
FIBP20	FIBP2004	Finland	Betula pendula	20	4	2000	45
FIBP20	FIBP2004	Finland	Betula pendula	20	4	2001	48
FIBP20	FIBP2004	Finland	Betula pendula	20	4	2002	32
FIBP20	FIBP2004	Finland	Betula pendula	20	4	2003	22
FIBP20	FIBP2004	Finland	Betula pendula	20	4	2004	19
FIBP20	FIBP2004	Finland	Betula pendula	20	4	2005	47
FIBP20	FIBP2004	Finland	Betula pendula	20	4	2006	87
FIBP20	FIBP2004	Finland	Betula pendula	20	4	2007	85
FIBP20	FIBP2004	Finland	Betula pendula	20	4	2008	118
FIBP20	FIBP2004	Finland	Betula pendula	20	4	2009	91
FIBP20	FIBP2004	Finland	Betula pendula	20	4	2010	103
FIBP20	FIBP2004	Finland	Betula pendula	20	4	2011	89
FIBP20	FIBP2004	Finland	Betula pendula	20	4	2012	105
FIBP20	FIBP2004	Finland	Betula pendula	20	4	2013	88
FIBP20	FIBP2004	Finland	Betula pendula	20	4	2014	128
FIBP20	FIBP2004	Finland	Betula pendula	20	4	2015	102
FIBP20	FIBP2005	Finland	Betula pendula	20	5	1979	108
FIBP20	FIBP2005	Finland	Betula pendula	20	5	1980	248
FIBP20	FIBP2005	Finland	Betula pendula	20	5	1981	380
FIBP20	FIBP2005	Finland	Betula pendula	20	5	1982	479
FIBP20	FIBP2005	Finland	Betula pendula	20	5	1983	364
FIBP20	FIBP2005	Finland	Betula pendula	20	5	1984	422
FIBP20	FIBP2005	Finland	Betula pendula	20	5	1985	413
FIBP20	FIBP2005	Finland	Betula pendula	20	5	1986	383
FIBP20	FIBP2005	Finland	Betula pendula	20	5	1987	258
FIBP20	FIBP2005	Finland	Betula pendula	20	5	1988	319
FIBP20	FIBP2005	Finland	Betula pendula	20	5	1989	297
FIBP20	FIBP2005	Finland	Betula pendula	20	5	1990	344
FIBP20	FIBP2005	Finland	Betula pendula	20	5	1991	220
FIBP20	FIBP2005	Finland	Betula pendula	20	5	1992	225
FIBP20	FIBP2005	Finland	Betula pendula	20	5	1993	269
FIBP20	FIBP2005	Finland	Betula pendula	20	5	1994	233
FIBP20	FIBP2005	Finland	Betula pendula	20	5	1995	157
FIBP20	FIBP2005	Finland	Betula pendula	20	5	1996	211
FIBP20	FIBP2005	Finland	Betula pendula	20	5	1997	220
FIBP20	FIBP2005	Finland	Betula pendula	20	5	1998	318
FIBP20	FIBP2005	Finland	Betula pendula	20	5	1999	267
FIBP20	FIBP2005	Finland	Betula pendula	20	5	2000	276
FIBP20	FIBP2005	Finland	Betula pendula	20	5	2001	267
FIBP20	FIBP2005	Finland	Betula pendula	20	5	2002	282
FIBP20	FIBP2005	Finland	Betula pendula	20	5	2003	209
FIBP20	FIBP2005	Finland	Betula pendula	20	5	2004	218
FIBP20	FIBP2005	Finland	Betula pendula	20	5	2005	219
FIBP20	FIBP2005	Finland	Betula pendula	20	5	2006	186
FIBP20	FIBP2005	Finland	Betula pendula	20	5	2007	211
FIBP20	FIBP2005	Finland	Betula pendula	20	5	2008	201
FIBP20	FIBP2005	Finland	Betula pendula	20	5	2009	206
FIBP20	FIBP2005	Finland	Betula pendula	20	5	2010	181
FIBP20	FIBP2005	Finland	Betula pendula	20	5	2011	215
FIBP20	FIBP2005	Finland	Betula pendula	20	5	2012	209
FIBP20	FIBP2005	Finland	Betula pendula	20	5	2013	161
FIBP20	FIBP2005	Finland	Betula pendula	20	5	2014	139
FIBP20	FIBP2005	Finland	Betula pendula	20	5	2015	130
FIBP20	FIBP2006	Finland	Betula pendula	20	6	1989	95
FIBP20	FIBP2006	Finland	Betula pendula	20	6	1990	65
FIBP20	FIBP2006	Finland	Betula pendula	20	6	1991	10
FIBP20	FIBP2006	Finland	Betula pendula	20	6	1992	40
FIBP20	FIBP2006	Finland	Betula pendula	20	6	1993	97
FIBP20	FIBP2006	Finland	Betula pendula	20	6	1994	76
FIBP20	FIBP2006	Finland	Betula pendula	20	6	1995	128
FIBP20	FIBP2006	Finland	Betula pendula	20	6	1996	35
FIBP20	FIBP2006	Finland	Betula pendula	20	6	1997	53
FIBP20	FIBP2006	Finland	Betula pendula	20	6	1998	290
FIBP20	FIBP2006	Finland	Betula pendula	20	6	1999	259
FIBP20	FIBP2006	Finland	Betula pendula	20	6	2000	300
FIBP20	FIBP2006	Finland	Betula pendula	20	6	2001	306
FIBP20	FIBP2006	Finland	Betula pendula	20	6	2002	310
FIBP20	FIBP2006	Finland	Betula pendula	20	6	2003	362
FIBP20	FIBP2006	Finland	Betula pendula	20	6	2004	532
FIBP20	FIBP2006	Finland	Betula pendula	20	6	2005	469
FIBP20	FIBP2006	Finland	Betula pendula	20	6	2006	397
FIBP20	FIBP2006	Finland	Betula pendula	20	6	2007	336
FIBP20	FIBP2006	Finland	Betula pendula	20	6	2008	299
FIBP20	FIBP2006	Finland	Betula pendula	20	6	2009	333
FIBP20	FIBP2006	Finland	Betula pendula	20	6	2010	200
FIBP20	FIBP2006	Finland	Betula pendula	20	6	2011	231
FIBP20	FIBP2006	Finland	Betula pendula	20	6	2012	253
FIBP20	FIBP2006	Finland	Betula pendula	20	6	2013	254
FIBP20	FIBP2006	Finland	Betula pendula	20	6	2014	177
FIBP20	FIBP2006	Finland	Betula pendula	20	6	2015	205
FIBP20	FIBP2007	Finland	Betula pendula	20	7	1966	86
FIBP20	FIBP2007	Finland	Betula pendula	20	7	1967	91
FIBP20	FIBP2007	Finland	Betula pendula	20	7	1968	59
FIBP20	FIBP2007	Finland	Betula pendula	20	7	1969	56
FIBP20	FIBP2007	Finland	Betula pendula	20	7	1970	43
FIBP20	FIBP2007	Finland	Betula pendula	20	7	1971	83
FIBP20	FIBP2007	Finland	Betula pendula	20	7	1972	56
FIBP20	FIBP2007	Finland	Betula pendula	20	7	1973	94
FIBP20	FIBP2007	Finland	Betula pendula	20	7	1974	103
FIBP20	FIBP2007	Finland	Betula pendula	20	7	1975	147
FIBP20	FIBP2007	Finland	Betula pendula	20	7	1976	147
FIBP20	FIBP2007	Finland	Betula pendula	20	7	1977	125
FIBP20	FIBP2007	Finland	Betula pendula	20	7	1978	152
FIBP20	FIBP2007	Finland	Betula pendula	20	7	1979	155
FIBP20	FIBP2007	Finland	Betula pendula	20	7	1980	170
FIBP20	FIBP2007	Finland	Betula pendula	20	7	1981	237
FIBP20	FIBP2007	Finland	Betula pendula	20	7	1982	141
FIBP20	FIBP2007	Finland	Betula pendula	20	7	1983	72
FIBP20	FIBP2007	Finland	Betula pendula	20	7	1984	92
FIBP20	FIBP2007	Finland	Betula pendula	20	7	1985	101
FIBP20	FIBP2007	Finland	Betula pendula	20	7	1986	140
FIBP20	FIBP2007	Finland	Betula pendula	20	7	1987	103
FIBP20	FIBP2007	Finland	Betula pendula	20	7	1988	106
FIBP20	FIBP2007	Finland	Betula pendula	20	7	1989	155
FIBP20	FIBP2007	Finland	Betula pendula	20	7	1990	135
FIBP20	FIBP2007	Finland	Betula pendula	20	7	1991	160
FIBP20	FIBP2007	Finland	Betula pendula	20	7	1992	171
FIBP20	FIBP2007	Finland	Betula pendula	20	7	1993	187
FIBP20	FIBP2007	Finland	Betula pendula	20	7	1994	133
FIBP20	FIBP2007	Finland	Betula pendula	20	7	1995	102
FIBP20	FIBP2007	Finland	Betula pendula	20	7	1996	129
FIBP20	FIBP2007	Finland	Betula pendula	20	7	1997	179
FIBP20	FIBP2007	Finland	Betula pendula	20	7	1998	226
FIBP20	FIBP2007	Finland	Betula pendula	20	7	1999	174
FIBP20	FIBP2007	Finland	Betula pendula	20	7	2000	172
FIBP20	FIBP2007	Finland	Betula pendula	20	7	2001	180
FIBP20	FIBP2007	Finland	Betula pendula	20	7	2002	154
FIBP20	FIBP2007	Finland	Betula pendula	20	7	2003	146
FIBP20	FIBP2007	Finland	Betula pendula	20	7	2004	116
FIBP20	FIBP2007	Finland	Betula pendula	20	7	2005	155
FIBP20	FIBP2007	Finland	Betula pendula	20	7	2006	195
FIBP20	FIBP2007	Finland	Betula pendula	20	7	2007	115
FIBP20	FIBP2007	Finland	Betula pendula	20	7	2008	137
FIBP20	FIBP2007	Finland	Betula pendula	20	7	2009	187
FIBP20	FIBP2007	Finland	Betula pendula	20	7	2010	159
FIBP20	FIBP2007	Finland	Betula pendula	20	7	2011	145
FIBP20	FIBP2007	Finland	Betula pendula	20	7	2012	157
FIBP20	FIBP2007	Finland	Betula pendula	20	7	2013	160
FIBP20	FIBP2007	Finland	Betula pendula	20	7	2014	124
FIBP20	FIBP2007	Finland	Betula pendula	20	7	2015	150
FIBP20	FIBP2008	Finland	Betula pendula	20	8	1972	367
FIBP20	FIBP2008	Finland	Betula pendula	20	8	1973	339
FIBP20	FIBP2008	Finland	Betula pendula	20	8	1974	490
FIBP20	FIBP2008	Finland	Betula pendula	20	8	1975	513
FIBP20	FIBP2008	Finland	Betula pendula	20	8	1976	447
FIBP20	FIBP2008	Finland	Betula pendula	20	8	1977	423
FIBP20	FIBP2008	Finland	Betula pendula	20	8	1978	342
FIBP20	FIBP2008	Finland	Betula pendula	20	8	1979	381
FIBP20	FIBP2008	Finland	Betula pendula	20	8	1980	409
FIBP20	FIBP2008	Finland	Betula pendula	20	8	1981	339
FIBP20	FIBP2008	Finland	Betula pendula	20	8	1982	296
FIBP20	FIBP2008	Finland	Betula pendula	20	8	1983	322
FIBP20	FIBP2008	Finland	Betula pendula	20	8	1984	231
FIBP20	FIBP2008	Finland	Betula pendula	20	8	1985	335
FIBP20	FIBP2008	Finland	Betula pendula	20	8	1986	284
FIBP20	FIBP2008	Finland	Betula pendula	20	8	1987	279
FIBP20	FIBP2008	Finland	Betula pendula	20	8	1988	285
FIBP20	FIBP2008	Finland	Betula pendula	20	8	1989	221
FIBP20	FIBP2008	Finland	Betula pendula	20	8	1990	249
FIBP20	FIBP2008	Finland	Betula pendula	20	8	1991	189
FIBP20	FIBP2008	Finland	Betula pendula	20	8	1992	167
FIBP20	FIBP2008	Finland	Betula pendula	20	8	1993	182
FIBP20	FIBP2008	Finland	Betula pendula	20	8	1994	176
FIBP20	FIBP2008	Finland	Betula pendula	20	8	1995	81
FIBP20	FIBP2008	Finland	Betula pendula	20	8	1996	141
FIBP20	FIBP2008	Finland	Betula pendula	20	8	1997	101
FIBP20	FIBP2008	Finland	Betula pendula	20	8	1998	137
FIBP20	FIBP2008	Finland	Betula pendula	20	8	1999	102
FIBP20	FIBP2008	Finland	Betula pendula	20	8	2000	137
FIBP20	FIBP2008	Finland	Betula pendula	20	8	2001	80
FIBP20	FIBP2008	Finland	Betula pendula	20	8	2002	73
FIBP20	FIBP2008	Finland	Betula pendula	20	8	2003	89
FIBP20	FIBP2008	Finland	Betula pendula	20	8	2004	80
FIBP20	FIBP2008	Finland	Betula pendula	20	8	2005	105
FIBP20	FIBP2008	Finland	Betula pendula	20	8	2006	111
FIBP20	FIBP2008	Finland	Betula pendula	20	8	2007	38
FIBP20	FIBP2008	Finland	Betula pendula	20	8	2008	46
FIBP20	FIBP2008	Finland	Betula pendula	20	8	2009	42
FIBP20	FIBP2008	Finland	Betula pendula	20	8	2010	89
FIBP20	FIBP2008	Finland	Betula pendula	20	8	2011	56
FIBP20	FIBP2008	Finland	Betula pendula	20	8	2012	55
FIBP20	FIBP2008	Finland	Betula pendula	20	8	2013	57
FIBP20	FIBP2008	Finland	Betula pendula	20	8	2014	47
FIBP20	FIBP2008	Finland	Betula pendula	20	8	2015	49
FIBP20	FIBP2009	Finland	Betula pendula	20	9	1970	685
FIBP20	FIBP2009	Finland	Betula pendula	20	9	1971	690
FIBP20	FIBP2009	Finland	Betula pendula	20	9	1972	452
FIBP20	FIBP2009	Finland	Betula pendula	20	9	1973	382
FIBP20	FIBP2009	Finland	Betula pendula	20	9	1974	471
FIBP20	FIBP2009	Finland	Betula pendula	20	9	1975	571
FIBP20	FIBP2009	Finland	Betula pendula	20	9	1976	315
FIBP20	FIBP2009	Finland	Betula pendula	20	9	1977	420
FIBP20	FIBP2009	Finland	Betula pendula	20	9	1978	393
FIBP20	FIBP2009	Finland	Betula pendula	20	9	1979	374
FIBP20	FIBP2009	Finland	Betula pendula	20	9	1980	251
FIBP20	FIBP2009	Finland	Betula pendula	20	9	1981	314
FIBP20	FIBP2009	Finland	Betula pendula	20	9	1982	273
FIBP20	FIBP2009	Finland	Betula pendula	20	9	1983	213
FIBP20	FIBP2009	Finland	Betula pendula	20	9	1984	198
FIBP20	FIBP2009	Finland	Betula pendula	20	9	1985	208
FIBP20	FIBP2009	Finland	Betula pendula	20	9	1986	295
FIBP20	FIBP2009	Finland	Betula pendula	20	9	1987	202
FIBP20	FIBP2009	Finland	Betula pendula	20	9	1988	250
FIBP20	FIBP2009	Finland	Betula pendula	20	9	1989	177
FIBP20	FIBP2009	Finland	Betula pendula	20	9	1990	181
FIBP20	FIBP2009	Finland	Betula pendula	20	9	1991	131
FIBP20	FIBP2009	Finland	Betula pendula	20	9	1992	176
FIBP20	FIBP2009	Finland	Betula pendula	20	9	1993	164
FIBP20	FIBP2009	Finland	Betula pendula	20	9	1994	167
FIBP20	FIBP2009	Finland	Betula pendula	20	9	1995	63
FIBP20	FIBP2009	Finland	Betula pendula	20	9	1996	58
FIBP20	FIBP2009	Finland	Betula pendula	20	9	1997	94
FIBP20	FIBP2009	Finland	Betula pendula	20	9	1998	133
FIBP20	FIBP2009	Finland	Betula pendula	20	9	1999	226
FIBP20	FIBP2009	Finland	Betula pendula	20	9	2000	271
FIBP20	FIBP2009	Finland	Betula pendula	20	9	2001	261
FIBP20	FIBP2009	Finland	Betula pendula	20	9	2002	122
FIBP20	FIBP2009	Finland	Betula pendula	20	9	2003	116
FIBP20	FIBP2009	Finland	Betula pendula	20	9	2004	123
FIBP20	FIBP2009	Finland	Betula pendula	20	9	2005	110
FIBP20	FIBP2009	Finland	Betula pendula	20	9	2006	100
FIBP20	FIBP2009	Finland	Betula pendula	20	9	2007	122
FIBP20	FIBP2009	Finland	Betula pendula	20	9	2008	95
FIBP20	FIBP2009	Finland	Betula pendula	20	9	2009	169
FIBP20	FIBP2009	Finland	Betula pendula	20	9	2010	311
FIBP20	FIBP2009	Finland	Betula pendula	20	9	2011	193
FIBP20	FIBP2009	Finland	Betula pendula	20	9	2012	163
FIBP20	FIBP2009	Finland	Betula pendula	20	9	2013	266
FIBP20	FIBP2009	Finland	Betula pendula	20	9	2014	77
FIBP20	FIBP2009	Finland	Betula pendula	20	9	2015	150
FIBP20	FIBP2010	Finland	Betula pendula	20	10	1967	155
FIBP20	FIBP2010	Finland	Betula pendula	20	10	1968	384
FIBP20	FIBP2010	Finland	Betula pendula	20	10	1969	71
FIBP20	FIBP2010	Finland	Betula pendula	20	10	1970	320
FIBP20	FIBP2010	Finland	Betula pendula	20	10	1971	542
FIBP20	FIBP2010	Finland	Betula pendula	20	10	1972	476
FIBP20	FIBP2010	Finland	Betula pendula	20	10	1973	511
FIBP20	FIBP2010	Finland	Betula pendula	20	10	1974	441
FIBP20	FIBP2010	Finland	Betula pendula	20	10	1975	666
FIBP20	FIBP2010	Finland	Betula pendula	20	10	1976	504
FIBP20	FIBP2010	Finland	Betula pendula	20	10	1977	527
FIBP20	FIBP2010	Finland	Betula pendula	20	10	1978	499
FIBP20	FIBP2010	Finland	Betula pendula	20	10	1979	461
FIBP20	FIBP2010	Finland	Betula pendula	20	10	1980	515
FIBP20	FIBP2010	Finland	Betula pendula	20	10	1981	504
FIBP20	FIBP2010	Finland	Betula pendula	20	10	1982	359
FIBP20	FIBP2010	Finland	Betula pendula	20	10	1983	335
FIBP20	FIBP2010	Finland	Betula pendula	20	10	1984	222
FIBP20	FIBP2010	Finland	Betula pendula	20	10	1985	185
FIBP20	FIBP2010	Finland	Betula pendula	20	10	1986	258
FIBP20	FIBP2010	Finland	Betula pendula	20	10	1987	248
FIBP20	FIBP2010	Finland	Betula pendula	20	10	1988	261
FIBP20	FIBP2010	Finland	Betula pendula	20	10	1989	239
FIBP20	FIBP2010	Finland	Betula pendula	20	10	1990	248
FIBP20	FIBP2010	Finland	Betula pendula	20	10	1991	240
FIBP20	FIBP2010	Finland	Betula pendula	20	10	1992	249
FIBP20	FIBP2010	Finland	Betula pendula	20	10	1993	209
FIBP20	FIBP2010	Finland	Betula pendula	20	10	1994	182
FIBP20	FIBP2010	Finland	Betula pendula	20	10	1995	89
FIBP20	FIBP2010	Finland	Betula pendula	20	10	1996	127
FIBP20	FIBP2010	Finland	Betula pendula	20	10	1997	85
FIBP20	FIBP2010	Finland	Betula pendula	20	10	1998	199
FIBP20	FIBP2010	Finland	Betula pendula	20	10	1999	111
FIBP20	FIBP2010	Finland	Betula pendula	20	10	2000	227
FIBP20	FIBP2010	Finland	Betula pendula	20	10	2001	210
FIBP20	FIBP2010	Finland	Betula pendula	20	10	2002	160
FIBP20	FIBP2010	Finland	Betula pendula	20	10	2003	164
FIBP20	FIBP2010	Finland	Betula pendula	20	10	2004	216
FIBP20	FIBP2010	Finland	Betula pendula	20	10	2005	179
FIBP20	FIBP2010	Finland	Betula pendula	20	10	2006	182
FIBP20	FIBP2010	Finland	Betula pendula	20	10	2007	165
FIBP20	FIBP2010	Finland	Betula pendula	20	10	2008	204
FIBP20	FIBP2010	Finland	Betula pendula	20	10	2009	202
FIBP20	FIBP2010	Finland	Betula pendula	20	10	2010	314
FIBP20	FIBP2010	Finland	Betula pendula	20	10	2011	228
FIBP20	FIBP2010	Finland	Betula pendula	20	10	2012	154
FIBP20	FIBP2010	Finland	Betula pendula	20	10	2013	185
FIBP20	FIBP2010	Finland	Betula pendula	20	10	2014	117
FIBP20	FIBP2010	Finland	Betula pendula	20	10	2015	194
FIBP20	FIBP2011	Finland	Betula pendula	20	11	1988	191
FIBP20	FIBP2011	Finland	Betula pendula	20	11	1989	158
FIBP20	FIBP2011	Finland	Betula pendula	20	11	1990	163
FIBP20	FIBP2011	Finland	Betula pendula	20	11	1991	115
FIBP20	FIBP2011	Finland	Betula pendula	20	11	1992	125
FIBP20	FIBP2011	Finland	Betula pendula	20	11	1993	165
FIBP20	FIBP2011	Finland	Betula pendula	20	11	1994	119
FIBP20	FIBP2011	Finland	Betula pendula	20	11	1995	137
FIBP20	FIBP2011	Finland	Betula pendula	20	11	1996	245
FIBP20	FIBP2011	Finland	Betula pendula	20	11	1997	206
FIBP20	FIBP2011	Finland	Betula pendula	20	11	1998	310
FIBP20	FIBP2011	Finland	Betula pendula	20	11	1999	232
FIBP20	FIBP2011	Finland	Betula pendula	20	11	2000	273
FIBP20	FIBP2011	Finland	Betula pendula	20	11	2001	268
FIBP20	FIBP2011	Finland	Betula pendula	20	11	2002	258
FIBP20	FIBP2011	Finland	Betula pendula	20	11	2003	235
FIBP20	FIBP2011	Finland	Betula pendula	20	11	2004	268
FIBP20	FIBP2011	Finland	Betula pendula	20	11	2005	315
FIBP20	FIBP2011	Finland	Betula pendula	20	11	2006	278
FIBP20	FIBP2011	Finland	Betula pendula	20	11	2007	187
FIBP20	FIBP2011	Finland	Betula pendula	20	11	2008	219
FIBP20	FIBP2011	Finland	Betula pendula	20	11	2009	225
FIBP20	FIBP2011	Finland	Betula pendula	20	11	2010	248
FIBP20	FIBP2011	Finland	Betula pendula	20	11	2011	289
FIBP20	FIBP2011	Finland	Betula pendula	20	11	2012	167
FIBP20	FIBP2011	Finland	Betula pendula	20	11	2013	165
FIBP20	FIBP2011	Finland	Betula pendula	20	11	2014	137
FIBP20	FIBP2011	Finland	Betula pendula	20	11	2015	148
FIBP20	FIBP2012	Finland	Betula pendula	20	12	1993	313
FIBP20	FIBP2012	Finland	Betula pendula	20	12	1994	273
FIBP20	FIBP2012	Finland	Betula pendula	20	12	1995	307
FIBP20	FIBP2012	Finland	Betula pendula	20	12	1996	192
FIBP20	FIBP2012	Finland	Betula pendula	20	12	1997	178
FIBP20	FIBP2012	Finland	Betula pendula	20	12	1998	338
FIBP20	FIBP2012	Finland	Betula pendula	20	12	1999	247
FIBP20	FIBP2012	Finland	Betula pendula	20	12	2000	397
FIBP20	FIBP2012	Finland	Betula pendula	20	12	2001	372
FIBP20	FIBP2012	Finland	Betula pendula	20	12	2002	415
FIBP20	FIBP2012	Finland	Betula pendula	20	12	2003	241
FIBP20	FIBP2012	Finland	Betula pendula	20	12	2004	377
FIBP20	FIBP2012	Finland	Betula pendula	20	12	2005	394
FIBP20	FIBP2012	Finland	Betula pendula	20	12	2006	309
FIBP20	FIBP2012	Finland	Betula pendula	20	12	2007	303
FIBP20	FIBP2012	Finland	Betula pendula	20	12	2008	285
FIBP20	FIBP2012	Finland	Betula pendula	20	12	2009	351
FIBP20	FIBP2012	Finland	Betula pendula	20	12	2010	357
FIBP20	FIBP2012	Finland	Betula pendula	20	12	2011	191
FIBP20	FIBP2012	Finland	Betula pendula	20	12	2012	235
FIBP20	FIBP2012	Finland	Betula pendula	20	12	2013	286
FIBP20	FIBP2012	Finland	Betula pendula	20	12	2014	227
FIBP20	FIBP2012	Finland	Betula pendula	20	12	2015	300
FIBP20	FIBP2013	Finland	Betula pendula	20	13	1962	190
FIBP20	FIBP2013	Finland	Betula pendula	20	13	1963	219
FIBP20	FIBP2013	Finland	Betula pendula	20	13	1964	195
FIBP20	FIBP2013	Finland	Betula pendula	20	13	1965	190
FIBP20	FIBP2013	Finland	Betula pendula	20	13	1966	287
FIBP20	FIBP2013	Finland	Betula pendula	20	13	1967	242
FIBP20	FIBP2013	Finland	Betula pendula	20	13	1968	197
FIBP20	FIBP2013	Finland	Betula pendula	20	13	1969	208
FIBP20	FIBP2013	Finland	Betula pendula	20	13	1970	221
FIBP20	FIBP2013	Finland	Betula pendula	20	13	1971	289
FIBP20	FIBP2013	Finland	Betula pendula	20	13	1972	255
FIBP20	FIBP2013	Finland	Betula pendula	20	13	1973	282
FIBP20	FIBP2013	Finland	Betula pendula	20	13	1974	219
FIBP20	FIBP2013	Finland	Betula pendula	20	13	1975	211
FIBP20	FIBP2013	Finland	Betula pendula	20	13	1976	247
FIBP20	FIBP2013	Finland	Betula pendula	20	13	1977	237
FIBP20	FIBP2013	Finland	Betula pendula	20	13	1978	168
FIBP20	FIBP2013	Finland	Betula pendula	20	13	1979	196
FIBP20	FIBP2013	Finland	Betula pendula	20	13	1980	231
FIBP20	FIBP2013	Finland	Betula pendula	20	13	1981	278
FIBP20	FIBP2013	Finland	Betula pendula	20	13	1982	245
FIBP20	FIBP2013	Finland	Betula pendula	20	13	1983	186
FIBP20	FIBP2013	Finland	Betula pendula	20	13	1984	205
FIBP20	FIBP2013	Finland	Betula pendula	20	13	1985	180
FIBP20	FIBP2013	Finland	Betula pendula	20	13	1986	216
FIBP20	FIBP2013	Finland	Betula pendula	20	13	1987	138
FIBP20	FIBP2013	Finland	Betula pendula	20	13	1988	277
FIBP20	FIBP2013	Finland	Betula pendula	20	13	1989	296
FIBP20	FIBP2013	Finland	Betula pendula	20	13	1990	290
FIBP20	FIBP2013	Finland	Betula pendula	20	13	1991	209
FIBP20	FIBP2013	Finland	Betula pendula	20	13	1992	208
FIBP20	FIBP2013	Finland	Betula pendula	20	13	1993	225
FIBP20	FIBP2013	Finland	Betula pendula	20	13	1994	221
FIBP20	FIBP2013	Finland	Betula pendula	20	13	1995	93
FIBP20	FIBP2013	Finland	Betula pendula	20	13	1996	202
FIBP20	FIBP2013	Finland	Betula pendula	20	13	1997	163
FIBP20	FIBP2013	Finland	Betula pendula	20	13	1998	246
FIBP20	FIBP2013	Finland	Betula pendula	20	13	1999	242
FIBP20	FIBP2013	Finland	Betula pendula	20	13	2000	194
FIBP20	FIBP2013	Finland	Betula pendula	20	13	2001	229
FIBP20	FIBP2013	Finland	Betula pendula	20	13	2002	111
FIBP20	FIBP2013	Finland	Betula pendula	20	13	2003	91
FIBP20	FIBP2013	Finland	Betula pendula	20	13	2004	142
FIBP20	FIBP2013	Finland	Betula pendula	20	13	2005	84
FIBP20	FIBP2013	Finland	Betula pendula	20	13	2006	50
FIBP20	FIBP2013	Finland	Betula pendula	20	13	2007	87
FIBP20	FIBP2013	Finland	Betula pendula	20	13	2008	100
FIBP20	FIBP2013	Finland	Betula pendula	20	13	2009	111
FIBP20	FIBP2013	Finland	Betula pendula	20	13	2010	60
FIBP20	FIBP2013	Finland	Betula pendula	20	13	2011	75
FIBP20	FIBP2013	Finland	Betula pendula	20	13	2012	67
FIBP20	FIBP2013	Finland	Betula pendula	20	13	2013	21
FIBP20	FIBP2013	Finland	Betula pendula	20	13	2014	19
FIBP20	FIBP2013	Finland	Betula pendula	20	13	2015	36
FIBP20	FIBP2014	Finland	Betula pendula	20	14	1983	89
FIBP20	FIBP2014	Finland	Betula pendula	20	14	1984	126
FIBP20	FIBP2014	Finland	Betula pendula	20	14	1985	47
FIBP20	FIBP2014	Finland	Betula pendula	20	14	1986	120
FIBP20	FIBP2014	Finland	Betula pendula	20	14	1987	175
FIBP20	FIBP2014	Finland	Betula pendula	20	14	1988	155
FIBP20	FIBP2014	Finland	Betula pendula	20	14	1989	159
FIBP20	FIBP2014	Finland	Betula pendula	20	14	1990	117
FIBP20	FIBP2014	Finland	Betula pendula	20	14	1991	98
FIBP20	FIBP2014	Finland	Betula pendula	20	14	1992	117
FIBP20	FIBP2014	Finland	Betula pendula	20	14	1993	119
FIBP20	FIBP2014	Finland	Betula pendula	20	14	1994	70
FIBP20	FIBP2014	Finland	Betula pendula	20	14	1995	47
FIBP20	FIBP2014	Finland	Betula pendula	20	14	1996	85
FIBP20	FIBP2014	Finland	Betula pendula	20	14	1997	146
FIBP20	FIBP2014	Finland	Betula pendula	20	14	1998	245
FIBP20	FIBP2014	Finland	Betula pendula	20	14	1999	220
FIBP20	FIBP2014	Finland	Betula pendula	20	14	2000	267
FIBP20	FIBP2014	Finland	Betula pendula	20	14	2001	219
FIBP20	FIBP2014	Finland	Betula pendula	20	14	2002	197
FIBP20	FIBP2014	Finland	Betula pendula	20	14	2003	191
FIBP20	FIBP2014	Finland	Betula pendula	20	14	2004	139
FIBP20	FIBP2014	Finland	Betula pendula	20	14	2005	127
FIBP20	FIBP2014	Finland	Betula pendula	20	14	2006	124
FIBP20	FIBP2014	Finland	Betula pendula	20	14	2007	160
FIBP20	FIBP2014	Finland	Betula pendula	20	14	2008	204
FIBP20	FIBP2014	Finland	Betula pendula	20	14	2009	157
FIBP20	FIBP2014	Finland	Betula pendula	20	14	2010	136
FIBP20	FIBP2014	Finland	Betula pendula	20	14	2011	152
FIBP20	FIBP2014	Finland	Betula pendula	20	14	2012	160
FIBP20	FIBP2014	Finland	Betula pendula	20	14	2013	199
FIBP20	FIBP2014	Finland	Betula pendula	20	14	2014	186
FIBP20	FIBP2014	Finland	Betula pendula	20	14	2015	198
FIBP20	FIBP2015	Finland	Betula pendula	20	15	1928	197
FIBP20	FIBP2015	Finland	Betula pendula	20	15	1929	225
FIBP20	FIBP2015	Finland	Betula pendula	20	15	1930	237
FIBP20	FIBP2015	Finland	Betula pendula	20	15	1931	174
FIBP20	FIBP2015	Finland	Betula pendula	20	15	1932	217
FIBP20	FIBP2015	Finland	Betula pendula	20	15	1933	150
FIBP20	FIBP2015	Finland	Betula pendula	20	15	1934	240
FIBP20	FIBP2015	Finland	Betula pendula	20	15	1935	252
FIBP20	FIBP2015	Finland	Betula pendula	20	15	1936	338
FIBP20	FIBP2015	Finland	Betula pendula	20	15	1937	246
FIBP20	FIBP2015	Finland	Betula pendula	20	15	1938	268
FIBP20	FIBP2015	Finland	Betula pendula	20	15	1939	275
FIBP20	FIBP2015	Finland	Betula pendula	20	15	1940	142
FIBP20	FIBP2015	Finland	Betula pendula	20	15	1941	174
FIBP20	FIBP2015	Finland	Betula pendula	20	15	1942	181
FIBP20	FIBP2015	Finland	Betula pendula	20	15	1943	232
FIBP20	FIBP2015	Finland	Betula pendula	20	15	1944	276
FIBP20	FIBP2015	Finland	Betula pendula	20	15	1945	291
FIBP20	FIBP2015	Finland	Betula pendula	20	15	1946	356
FIBP20	FIBP2015	Finland	Betula pendula	20	15	1947	255
FIBP20	FIBP2015	Finland	Betula pendula	20	15	1948	209
FIBP20	FIBP2015	Finland	Betula pendula	20	15	1949	225
FIBP20	FIBP2015	Finland	Betula pendula	20	15	1950	225
FIBP20	FIBP2015	Finland	Betula pendula	20	15	1951	305
FIBP20	FIBP2015	Finland	Betula pendula	20	15	1952	299
FIBP20	FIBP2015	Finland	Betula pendula	20	15	1953	364
FIBP20	FIBP2015	Finland	Betula pendula	20	15	1954	270
FIBP20	FIBP2015	Finland	Betula pendula	20	15	1955	225
FIBP20	FIBP2015	Finland	Betula pendula	20	15	1956	201
FIBP20	FIBP2015	Finland	Betula pendula	20	15	1957	244
FIBP20	FIBP2015	Finland	Betula pendula	20	15	1958	199
FIBP20	FIBP2015	Finland	Betula pendula	20	15	1959	231
FIBP20	FIBP2015	Finland	Betula pendula	20	15	1960	226
FIBP20	FIBP2015	Finland	Betula pendula	20	15	1961	263
FIBP20	FIBP2015	Finland	Betula pendula	20	15	1962	157
FIBP20	FIBP2015	Finland	Betula pendula	20	15	1963	293
FIBP20	FIBP2015	Finland	Betula pendula	20	15	1964	192
FIBP20	FIBP2015	Finland	Betula pendula	20	15	1965	172
FIBP20	FIBP2015	Finland	Betula pendula	20	15	1966	200
FIBP20	FIBP2015	Finland	Betula pendula	20	15	1967	110
FIBP20	FIBP2015	Finland	Betula pendula	20	15	1968	162
FIBP20	FIBP2015	Finland	Betula pendula	20	15	1969	180
FIBP20	FIBP2015	Finland	Betula pendula	20	15	1970	123
FIBP20	FIBP2015	Finland	Betula pendula	20	15	1971	135
FIBP20	FIBP2015	Finland	Betula pendula	20	15	1972	115
FIBP20	FIBP2015	Finland	Betula pendula	20	15	1973	139
FIBP20	FIBP2015	Finland	Betula pendula	20	15	1974	134
FIBP20	FIBP2015	Finland	Betula pendula	20	15	1975	194
FIBP20	FIBP2015	Finland	Betula pendula	20	15	1976	195
FIBP20	FIBP2015	Finland	Betula pendula	20	15	1977	189
FIBP20	FIBP2015	Finland	Betula pendula	20	15	1978	135
FIBP20	FIBP2015	Finland	Betula pendula	20	15	1979	103
FIBP20	FIBP2015	Finland	Betula pendula	20	15	1980	42
FIBP20	FIBP2015	Finland	Betula pendula	20	15	1981	110
FIBP20	FIBP2015	Finland	Betula pendula	20	15	1982	165
FIBP20	FIBP2015	Finland	Betula pendula	20	15	1983	189
FIBP20	FIBP2015	Finland	Betula pendula	20	15	1984	165
FIBP20	FIBP2015	Finland	Betula pendula	20	15	1985	93
FIBP20	FIBP2015	Finland	Betula pendula	20	15	1986	142
FIBP20	FIBP2015	Finland	Betula pendula	20	15	1987	96
FIBP20	FIBP2015	Finland	Betula pendula	20	15	1988	114
FIBP20	FIBP2015	Finland	Betula pendula	20	15	1989	132
FIBP20	FIBP2015	Finland	Betula pendula	20	15	1990	86
FIBP20	FIBP2015	Finland	Betula pendula	20	15	1991	92
FIBP20	FIBP2015	Finland	Betula pendula	20	15	1992	122
FIBP20	FIBP2015	Finland	Betula pendula	20	15	1993	43
FIBP20	FIBP2015	Finland	Betula pendula	20	15	1994	40
FIBP20	FIBP2015	Finland	Betula pendula	20	15	1995	15
FIBP20	FIBP2015	Finland	Betula pendula	20	15	1996	69
FIBP20	FIBP2015	Finland	Betula pendula	20	15	1997	60
FIBP20	FIBP2015	Finland	Betula pendula	20	15	1998	35
FIBP20	FIBP2015	Finland	Betula pendula	20	15	1999	99
FIBP20	FIBP2015	Finland	Betula pendula	20	15	2000	91
FIBP20	FIBP2015	Finland	Betula pendula	20	15	2001	81
FIBP20	FIBP2015	Finland	Betula pendula	20	15	2002	112
FIBP20	FIBP2015	Finland	Betula pendula	20	15	2003	62
FIBP20	FIBP2015	Finland	Betula pendula	20	15	2004	108
FIBP20	FIBP2015	Finland	Betula pendula	20	15	2005	121
FIBP20	FIBP2015	Finland	Betula pendula	20	15	2006	96
FIBP20	FIBP2015	Finland	Betula pendula	20	15	2007	81
FIBP20	FIBP2015	Finland	Betula pendula	20	15	2008	120
FIBP20	FIBP2015	Finland	Betula pendula	20	15	2009	84
FIBP20	FIBP2015	Finland	Betula pendula	20	15	2010	66
FIBP20	FIBP2015	Finland	Betula pendula	20	15	2011	49
FIBP20	FIBP2015	Finland	Betula pendula	20	15	2012	56
FIBP20	FIBP2015	Finland	Betula pendula	20	15	2013	97
FIBP20	FIBP2015	Finland	Betula pendula	20	15	2014	54
FIBP20	FIBP2015	Finland	Betula pendula	20	15	2015	47
FIBP20	FIBP2016	Finland	Betula pendula	20	16	1990	146
FIBP20	FIBP2016	Finland	Betula pendula	20	16	1991	155
FIBP20	FIBP2016	Finland	Betula pendula	20	16	1992	97
FIBP20	FIBP2016	Finland	Betula pendula	20	16	1993	141
FIBP20	FIBP2016	Finland	Betula pendula	20	16	1994	173
FIBP20	FIBP2016	Finland	Betula pendula	20	16	1995	110
FIBP20	FIBP2016	Finland	Betula pendula	20	16	1996	150
FIBP20	FIBP2016	Finland	Betula pendula	20	16	1997	200
FIBP20	FIBP2016	Finland	Betula pendula	20	16	1998	353
FIBP20	FIBP2016	Finland	Betula pendula	20	16	1999	385
FIBP20	FIBP2016	Finland	Betula pendula	20	16	2000	375
FIBP20	FIBP2016	Finland	Betula pendula	20	16	2001	335
FIBP20	FIBP2016	Finland	Betula pendula	20	16	2002	279
FIBP20	FIBP2016	Finland	Betula pendula	20	16	2003	240
FIBP20	FIBP2016	Finland	Betula pendula	20	16	2004	204
FIBP20	FIBP2016	Finland	Betula pendula	20	16	2005	240
FIBP20	FIBP2016	Finland	Betula pendula	20	16	2006	243
FIBP20	FIBP2016	Finland	Betula pendula	20	16	2007	229
FIBP20	FIBP2016	Finland	Betula pendula	20	16	2008	202
FIBP20	FIBP2016	Finland	Betula pendula	20	16	2009	201
FIBP20	FIBP2016	Finland	Betula pendula	20	16	2010	197
FIBP20	FIBP2016	Finland	Betula pendula	20	16	2011	126
FIBP20	FIBP2016	Finland	Betula pendula	20	16	2012	109
FIBP20	FIBP2016	Finland	Betula pendula	20	16	2013	133
FIBP20	FIBP2016	Finland	Betula pendula	20	16	2014	132
FIBP20	FIBP2016	Finland	Betula pendula	20	16	2015	141
FIBP20	FIBP2017	Finland	Betula pendula	20	17	1937	181
FIBP20	FIBP2017	Finland	Betula pendula	20	17	1938	219
FIBP20	FIBP2017	Finland	Betula pendula	20	17	1939	147
FIBP20	FIBP2017	Finland	Betula pendula	20	17	1940	214
FIBP20	FIBP2017	Finland	Betula pendula	20	17	1941	213
FIBP20	FIBP2017	Finland	Betula pendula	20	17	1942	168
FIBP20	FIBP2017	Finland	Betula pendula	20	17	1943	150
FIBP20	FIBP2017	Finland	Betula pendula	20	17	1944	245
FIBP20	FIBP2017	Finland	Betula pendula	20	17	1945	215
FIBP20	FIBP2017	Finland	Betula pendula	20	17	1946	148
FIBP20	FIBP2017	Finland	Betula pendula	20	17	1947	130
FIBP20	FIBP2017	Finland	Betula pendula	20	17	1948	68
FIBP20	FIBP2017	Finland	Betula pendula	20	17	1949	144
FIBP20	FIBP2017	Finland	Betula pendula	20	17	1950	123
FIBP20	FIBP2017	Finland	Betula pendula	20	17	1951	190
FIBP20	FIBP2017	Finland	Betula pendula	20	17	1952	187
FIBP20	FIBP2017	Finland	Betula pendula	20	17	1953	292
FIBP20	FIBP2017	Finland	Betula pendula	20	17	1954	290
FIBP20	FIBP2017	Finland	Betula pendula	20	17	1955	350
FIBP20	FIBP2017	Finland	Betula pendula	20	17	1956	258
FIBP20	FIBP2017	Finland	Betula pendula	20	17	1957	366
FIBP20	FIBP2017	Finland	Betula pendula	20	17	1958	399
FIBP20	FIBP2017	Finland	Betula pendula	20	17	1959	389
FIBP20	FIBP2017	Finland	Betula pendula	20	17	1960	395
FIBP20	FIBP2017	Finland	Betula pendula	20	17	1961	355
FIBP20	FIBP2017	Finland	Betula pendula	20	17	1962	313
FIBP20	FIBP2017	Finland	Betula pendula	20	17	1963	389
FIBP20	FIBP2017	Finland	Betula pendula	20	17	1964	241
FIBP20	FIBP2017	Finland	Betula pendula	20	17	1965	214
FIBP20	FIBP2017	Finland	Betula pendula	20	17	1966	264
FIBP20	FIBP2017	Finland	Betula pendula	20	17	1967	299
FIBP20	FIBP2017	Finland	Betula pendula	20	17	1968	198
FIBP20	FIBP2017	Finland	Betula pendula	20	17	1969	159
FIBP20	FIBP2017	Finland	Betula pendula	20	17	1970	154
FIBP20	FIBP2017	Finland	Betula pendula	20	17	1971	162
FIBP20	FIBP2017	Finland	Betula pendula	20	17	1972	173
FIBP20	FIBP2017	Finland	Betula pendula	20	17	1973	189
FIBP20	FIBP2017	Finland	Betula pendula	20	17	1974	193
FIBP20	FIBP2017	Finland	Betula pendula	20	17	1975	316
FIBP20	FIBP2017	Finland	Betula pendula	20	17	1976	227
FIBP20	FIBP2017	Finland	Betula pendula	20	17	1977	243
FIBP20	FIBP2017	Finland	Betula pendula	20	17	1978	158
FIBP20	FIBP2017	Finland	Betula pendula	20	17	1979	176
FIBP20	FIBP2017	Finland	Betula pendula	20	17	1980	124
FIBP20	FIBP2017	Finland	Betula pendula	20	17	1981	139
FIBP20	FIBP2017	Finland	Betula pendula	20	17	1982	282
FIBP20	FIBP2017	Finland	Betula pendula	20	17	1983	192
FIBP20	FIBP2017	Finland	Betula pendula	20	17	1984	189
FIBP20	FIBP2017	Finland	Betula pendula	20	17	1985	125
FIBP20	FIBP2017	Finland	Betula pendula	20	17	1986	190
FIBP20	FIBP2017	Finland	Betula pendula	20	17	1987	153
FIBP20	FIBP2017	Finland	Betula pendula	20	17	1988	192
FIBP20	FIBP2017	Finland	Betula pendula	20	17	1989	131
FIBP20	FIBP2017	Finland	Betula pendula	20	17	1990	209
FIBP20	FIBP2017	Finland	Betula pendula	20	17	1991	98
FIBP20	FIBP2017	Finland	Betula pendula	20	17	1992	140
FIBP20	FIBP2017	Finland	Betula pendula	20	17	1993	142
FIBP20	FIBP2017	Finland	Betula pendula	20	17	1994	92
FIBP20	FIBP2017	Finland	Betula pendula	20	17	1995	33
FIBP20	FIBP2017	Finland	Betula pendula	20	17	1996	81
FIBP20	FIBP2017	Finland	Betula pendula	20	17	1997	64
FIBP20	FIBP2017	Finland	Betula pendula	20	17	1998	68
FIBP20	FIBP2017	Finland	Betula pendula	20	17	1999	110
FIBP20	FIBP2017	Finland	Betula pendula	20	17	2000	149
FIBP20	FIBP2017	Finland	Betula pendula	20	17	2001	164
FIBP20	FIBP2017	Finland	Betula pendula	20	17	2002	180
FIBP20	FIBP2017	Finland	Betula pendula	20	17	2003	110
FIBP20	FIBP2017	Finland	Betula pendula	20	17	2004	98
FIBP20	FIBP2017	Finland	Betula pendula	20	17	2005	145
FIBP20	FIBP2017	Finland	Betula pendula	20	17	2006	147
FIBP20	FIBP2017	Finland	Betula pendula	20	17	2007	164
FIBP20	FIBP2017	Finland	Betula pendula	20	17	2008	113
FIBP20	FIBP2017	Finland	Betula pendula	20	17	2009	107
FIBP20	FIBP2017	Finland	Betula pendula	20	17	2010	76
FIBP20	FIBP2017	Finland	Betula pendula	20	17	2011	98
FIBP20	FIBP2017	Finland	Betula pendula	20	17	2012	82
FIBP20	FIBP2017	Finland	Betula pendula	20	17	2013	115
FIBP20	FIBP2017	Finland	Betula pendula	20	17	2014	101
FIBP20	FIBP2017	Finland	Betula pendula	20	17	2015	85
FIBP20	FIBP2018	Finland	Betula pendula	20	18	1971	253
FIBP20	FIBP2018	Finland	Betula pendula	20	18	1972	410
FIBP20	FIBP2018	Finland	Betula pendula	20	18	1973	289
FIBP20	FIBP2018	Finland	Betula pendula	20	18	1974	312
FIBP20	FIBP2018	Finland	Betula pendula	20	18	1975	468
FIBP20	FIBP2018	Finland	Betula pendula	20	18	1976	369
FIBP20	FIBP2018	Finland	Betula pendula	20	18	1977	391
FIBP20	FIBP2018	Finland	Betula pendula	20	18	1978	309
FIBP20	FIBP2018	Finland	Betula pendula	20	18	1979	339
FIBP20	FIBP2018	Finland	Betula pendula	20	18	1980	296
FIBP20	FIBP2018	Finland	Betula pendula	20	18	1981	330
FIBP20	FIBP2018	Finland	Betula pendula	20	18	1982	333
FIBP20	FIBP2018	Finland	Betula pendula	20	18	1983	213
FIBP20	FIBP2018	Finland	Betula pendula	20	18	1984	288
FIBP20	FIBP2018	Finland	Betula pendula	20	18	1985	317
FIBP20	FIBP2018	Finland	Betula pendula	20	18	1986	352
FIBP20	FIBP2018	Finland	Betula pendula	20	18	1987	228
FIBP20	FIBP2018	Finland	Betula pendula	20	18	1988	302
FIBP20	FIBP2018	Finland	Betula pendula	20	18	1989	293
FIBP20	FIBP2018	Finland	Betula pendula	20	18	1990	320
FIBP20	FIBP2018	Finland	Betula pendula	20	18	1991	290
FIBP20	FIBP2018	Finland	Betula pendula	20	18	1992	241
FIBP20	FIBP2018	Finland	Betula pendula	20	18	1993	221
FIBP20	FIBP2018	Finland	Betula pendula	20	18	1994	212
FIBP20	FIBP2018	Finland	Betula pendula	20	18	1995	132
FIBP20	FIBP2018	Finland	Betula pendula	20	18	1996	170
FIBP20	FIBP2018	Finland	Betula pendula	20	18	1997	199
FIBP20	FIBP2018	Finland	Betula pendula	20	18	1998	177
FIBP20	FIBP2018	Finland	Betula pendula	20	18	1999	182
FIBP20	FIBP2018	Finland	Betula pendula	20	18	2000	168
FIBP20	FIBP2018	Finland	Betula pendula	20	18	2001	153
FIBP20	FIBP2018	Finland	Betula pendula	20	18	2002	129
FIBP20	FIBP2018	Finland	Betula pendula	20	18	2003	95
FIBP20	FIBP2018	Finland	Betula pendula	20	18	2004	112
FIBP20	FIBP2018	Finland	Betula pendula	20	18	2005	98
FIBP20	FIBP2018	Finland	Betula pendula	20	18	2006	47
FIBP20	FIBP2018	Finland	Betula pendula	20	18	2007	17
FIBP20	FIBP2018	Finland	Betula pendula	20	18	2008	70
FIBP20	FIBP2018	Finland	Betula pendula	20	18	2009	67
FIBP20	FIBP2018	Finland	Betula pendula	20	18	2010	32
FIBP20	FIBP2018	Finland	Betula pendula	20	18	2011	28
FIBP20	FIBP2018	Finland	Betula pendula	20	18	2012	27
FIBP20	FIBP2018	Finland	Betula pendula	20	18	2013	29
FIBP20	FIBP2018	Finland	Betula pendula	20	18	2014	14
FIBP20	FIBP2018	Finland	Betula pendula	20	18	2015	74
FIBP20	FIBP2019	Finland	Betula pendula	20	19	1991	194
FIBP20	FIBP2019	Finland	Betula pendula	20	19	1992	152
FIBP20	FIBP2019	Finland	Betula pendula	20	19	1993	130
FIBP20	FIBP2019	Finland	Betula pendula	20	19	1994	122
FIBP20	FIBP2019	Finland	Betula pendula	20	19	1995	45
FIBP20	FIBP2019	Finland	Betula pendula	20	19	1996	93
FIBP20	FIBP2019	Finland	Betula pendula	20	19	1997	244
FIBP20	FIBP2019	Finland	Betula pendula	20	19	1998	474
FIBP20	FIBP2019	Finland	Betula pendula	20	19	1999	306
FIBP20	FIBP2019	Finland	Betula pendula	20	19	2000	376
FIBP20	FIBP2019	Finland	Betula pendula	20	19	2001	329
FIBP20	FIBP2019	Finland	Betula pendula	20	19	2002	352
FIBP20	FIBP2019	Finland	Betula pendula	20	19	2003	245
FIBP20	FIBP2019	Finland	Betula pendula	20	19	2004	304
FIBP20	FIBP2019	Finland	Betula pendula	20	19	2005	279
FIBP20	FIBP2019	Finland	Betula pendula	20	19	2006	252
FIBP20	FIBP2019	Finland	Betula pendula	20	19	2007	142
FIBP20	FIBP2019	Finland	Betula pendula	20	19	2008	232
FIBP20	FIBP2019	Finland	Betula pendula	20	19	2009	216
FIBP20	FIBP2019	Finland	Betula pendula	20	19	2010	174
FIBP20	FIBP2019	Finland	Betula pendula	20	19	2011	171
FIBP20	FIBP2019	Finland	Betula pendula	20	19	2012	185
FIBP20	FIBP2019	Finland	Betula pendula	20	19	2013	145
FIBP20	FIBP2019	Finland	Betula pendula	20	19	2014	60
FIBP20	FIBP2019	Finland	Betula pendula	20	19	2015	118
FIBP20	FIBP2020	Finland	Betula pendula	20	20	1966	258
FIBP20	FIBP2020	Finland	Betula pendula	20	20	1967	227
FIBP20	FIBP2020	Finland	Betula pendula	20	20	1968	238
FIBP20	FIBP2020	Finland	Betula pendula	20	20	1969	196
FIBP20	FIBP2020	Finland	Betula pendula	20	20	1970	211
FIBP20	FIBP2020	Finland	Betula pendula	20	20	1971	257
[truncated: 285,302 more rows]
